# Supplementary material for: Aqueous SDS micelle-promoted acid-catalyzed domino ABB′ imino Diels–Alder reaction: a mild and efficient synthesis of privileged 2-methyl-tetrahydroquinoline scaffolds
Source: Royal Society of Chemistry journal article supplement (doi:10.1039/c3ob40171e), 2013-01-01

**Supplementary Information  
for**

**Aqueous SDS micelle-promoted acid-catalyzed domino ABB'  
imino Diels-Alder reaction: a mild and efficient synthesis of  
privileged 2-methyl-tetrahydroquinoline scaffolds**

Diego R. Merchán Arenas, Carlos A. Martínez Bonilla and Vladimir V. Kouznetsov

Laboratorio de Química Orgánica y Biomolecular, Escuela de Química, Universidad Industrial de  
Santander, A. A. 678, Bucaramanga, Colombia.

E-mail: [kouznet@uis.edu.co](mailto:kouznet@uis.edu.co), [vkuznechnik@gmail.com](mailto:vkuznechnik@gmail.com)

| <b>Table of Contents</b>                                                                      | <b>Pages</b>  |
|-----------------------------------------------------------------------------------------------|---------------|
| <b>1. General experimental details</b>                                                        | <b>S1</b>     |
| <b>2. Copies of MS, <sup>1</sup>H NMR, <sup>13</sup>C NMR and 2D spectra of all compounds</b> | <b>S2-S41</b> |

**1. General experimental details**

The reagents were of synthesis degree and were used without previous purification. The melting points (uncorrected) were determined with a Fisher-Johns melting point apparatus. The IR spectra were recorded on a Lumex Infracum FT-02 spectrophotometer in KBr and thin film. NMR (1D and 2D) spectra were recorded on Bruker Avance-400 spectrometer. Chemical shifts are reported in ppm ( $\delta$ ) relative to the solvent peak (2.50 and 7.26 ppm for DMSO-*d*<sub>6</sub> and CDCl<sub>3</sub> for protons, respectively). A Agilent Technologies 6890 plus Gas Chromatograph interfaced to an Agilent Technologies MSD 5963 Selective Detector (MSD) with a Chemstation Data system G17001DA was used for MS identification at 70 eV using a 60 m capillary column coated with HP-5 [5 %-phenyl-poly(dimethyl-siloxane)]. Elemental analyses were performed on a Perkin Elmer 2400 Series II analyzer and were within  $\pm 0.4$  of theoretical values. The reaction progress was monitored using thin layer chromatography on a silufol UV254 TLC aluminum sheet.

## 2. Copies of MS, $^1\text{H}$ NMR, $^{13}\text{C}$ NMR and 2D spectra of THQ compounds.

*N*-(6-Acetyl-2-methyl-1,2,3,4-tetrahydroquinolin-4-yl) acetamide, **3a**.

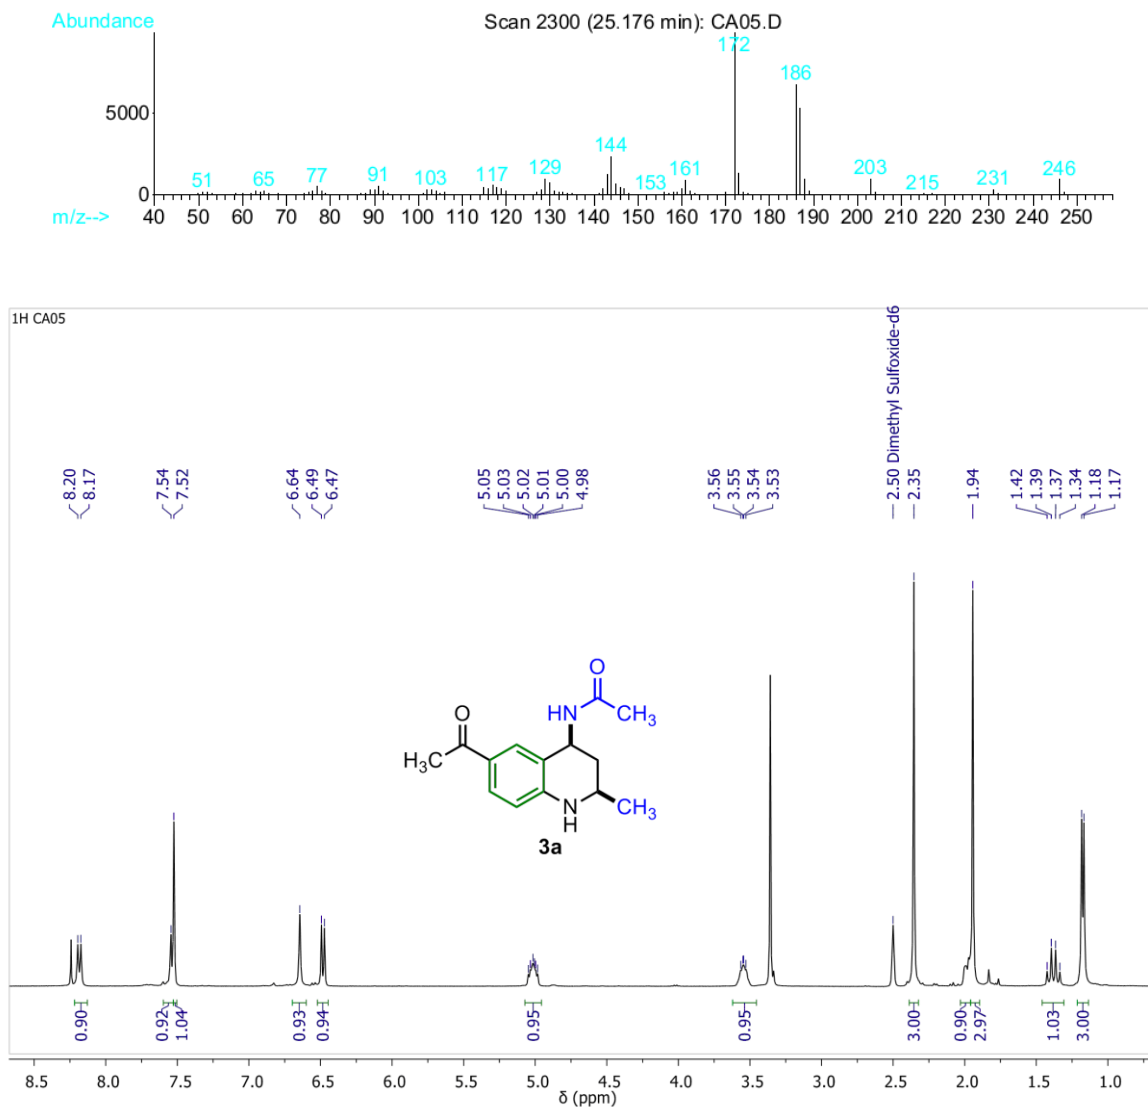

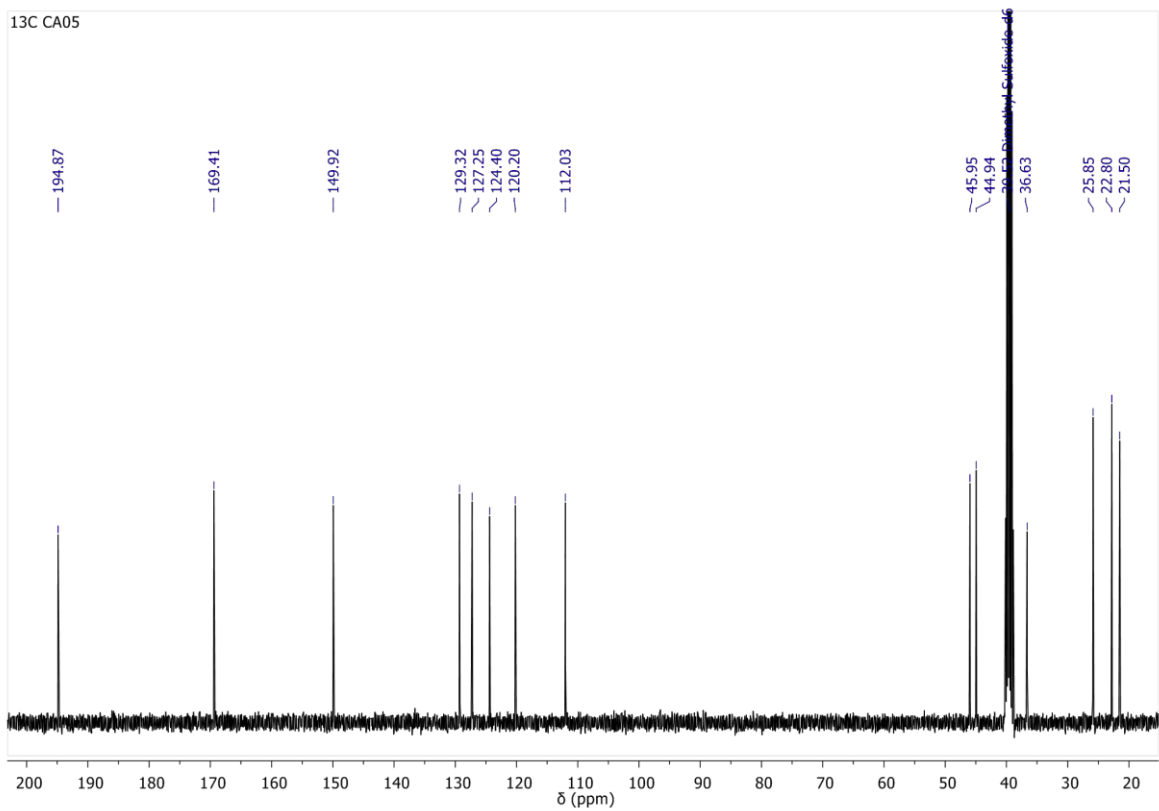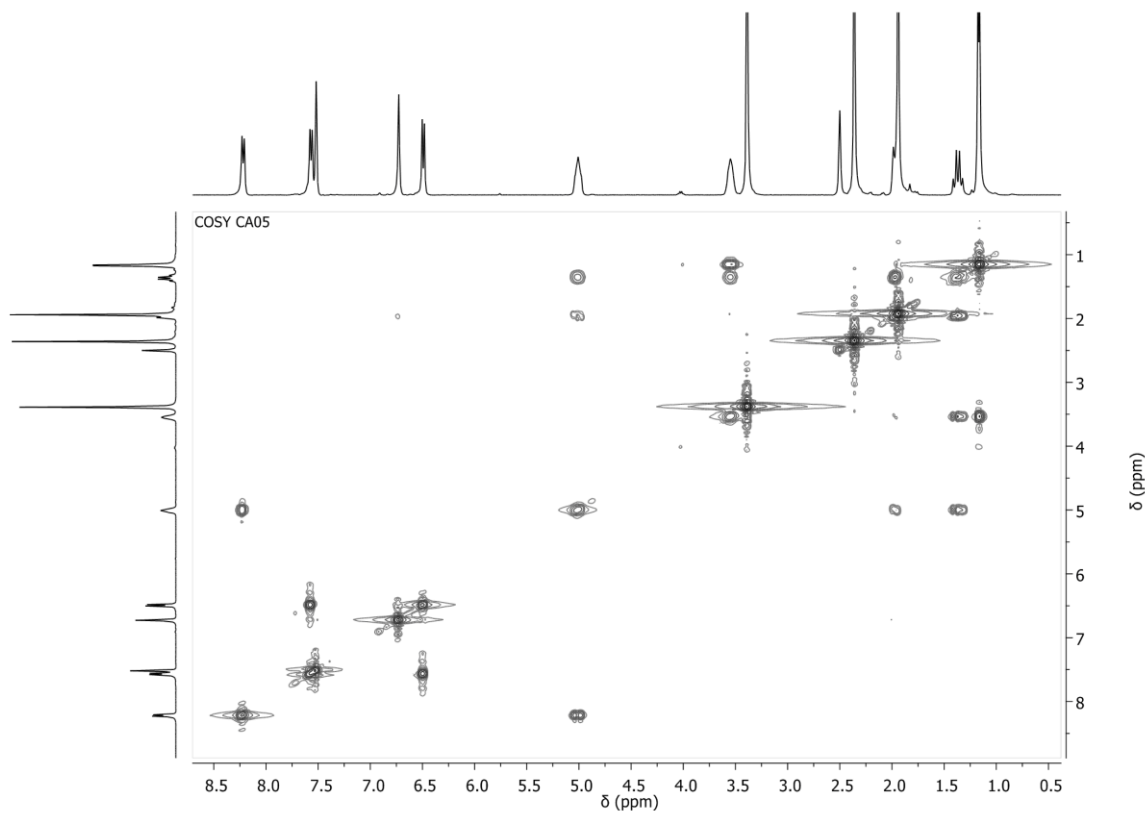

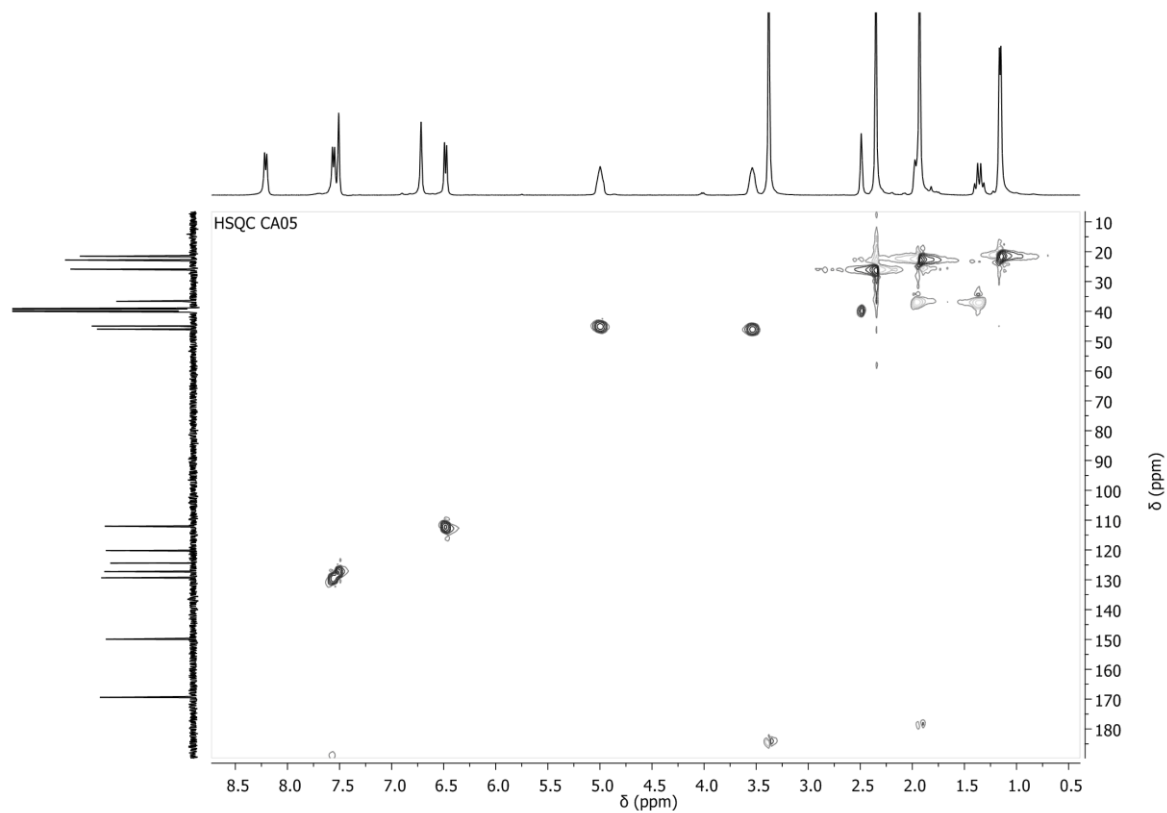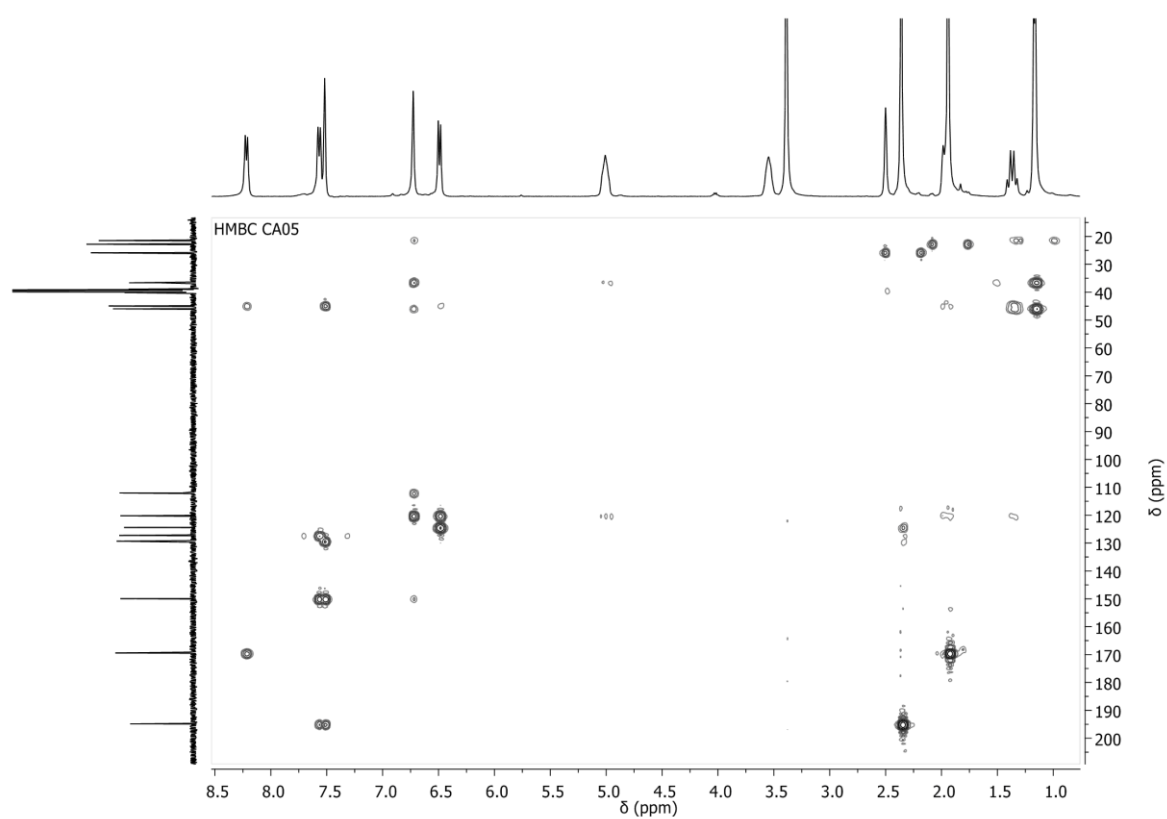

*N*-(2-Methyl-1,2,3,4-tetrahydroquinolin-4-yl) acetamide, **3b**.

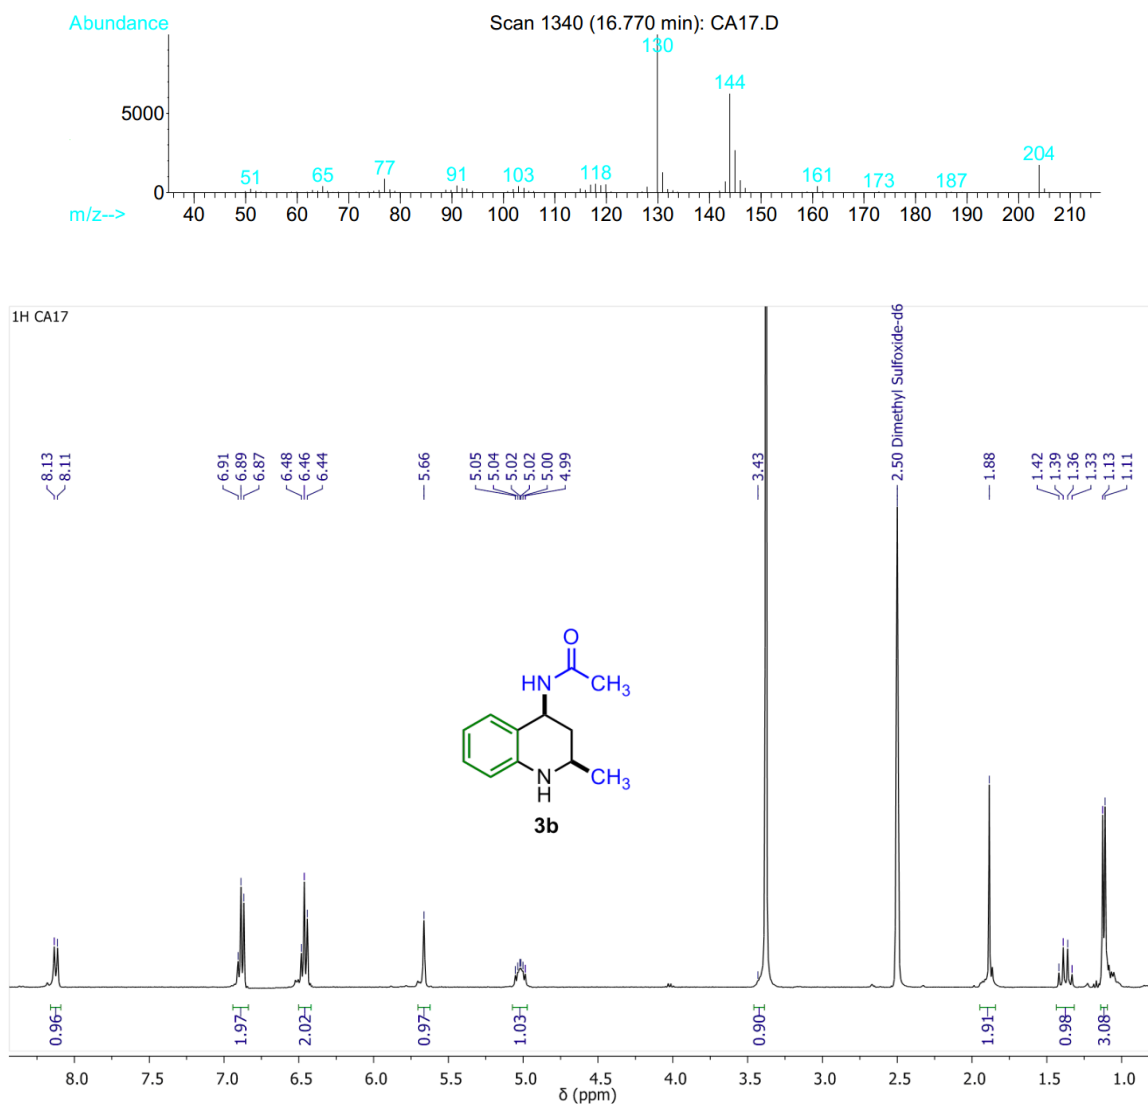

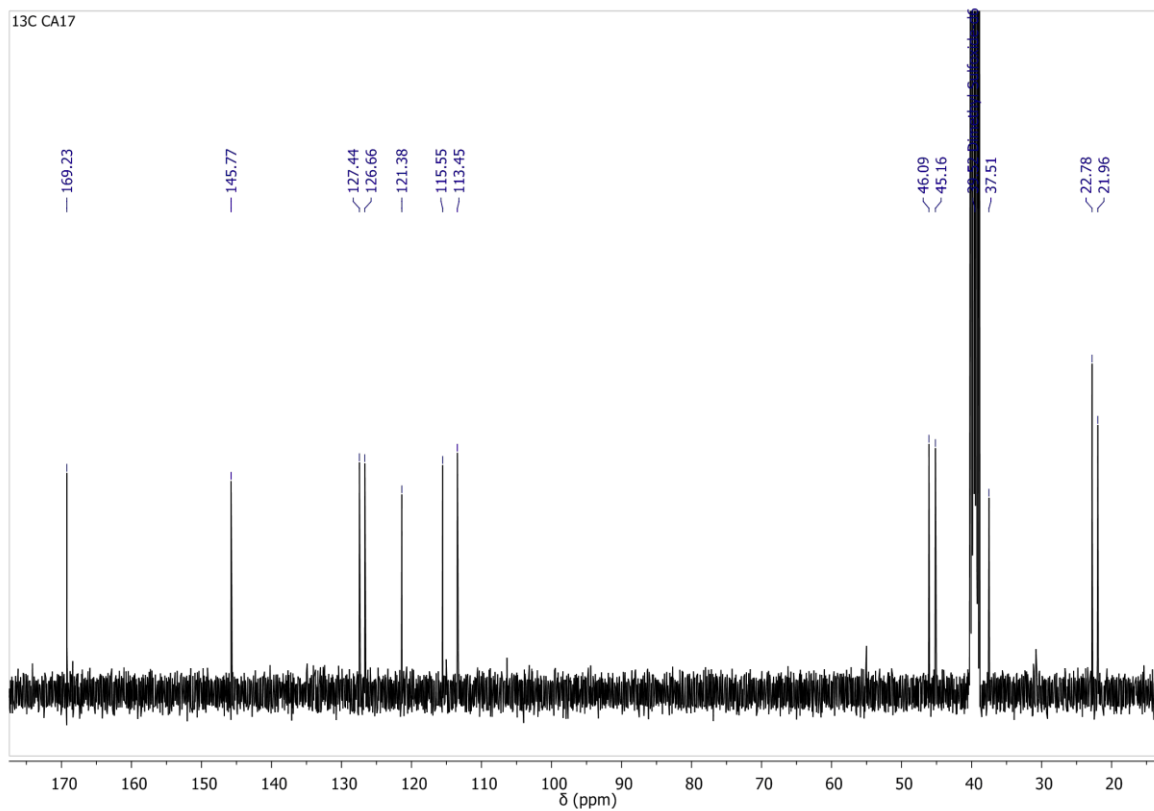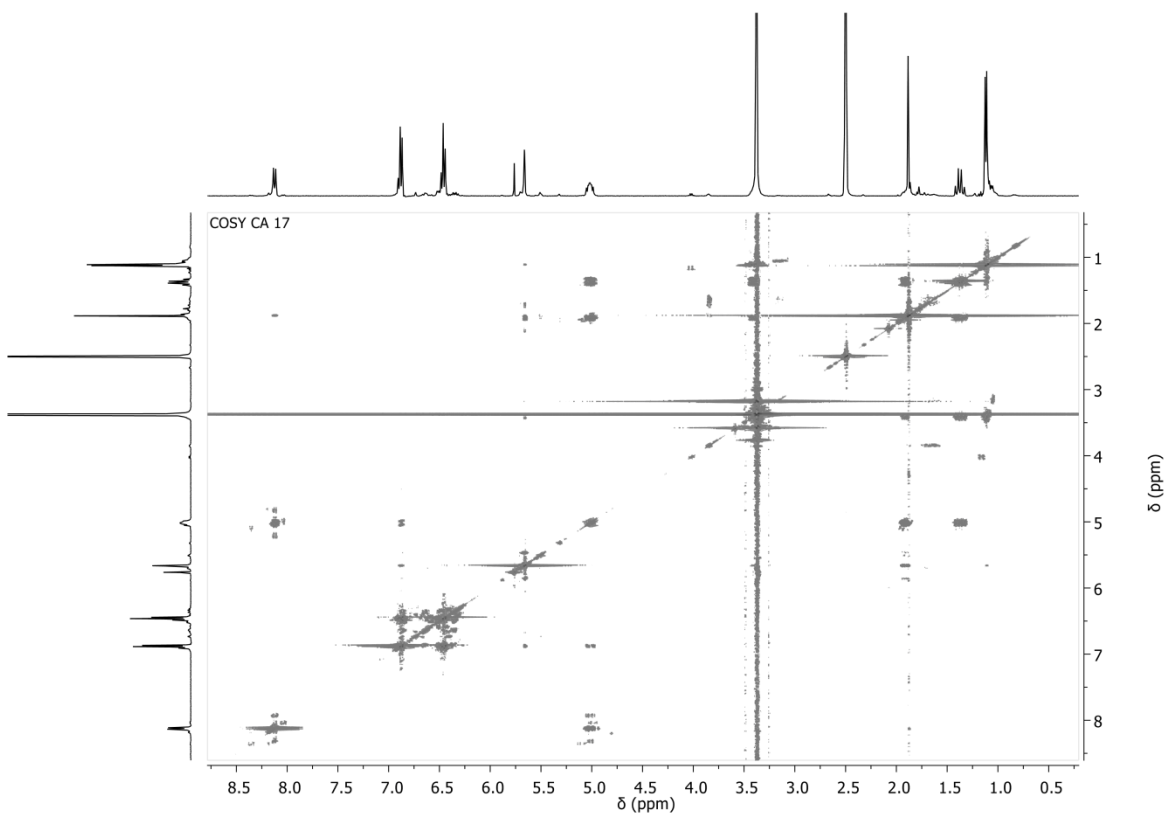

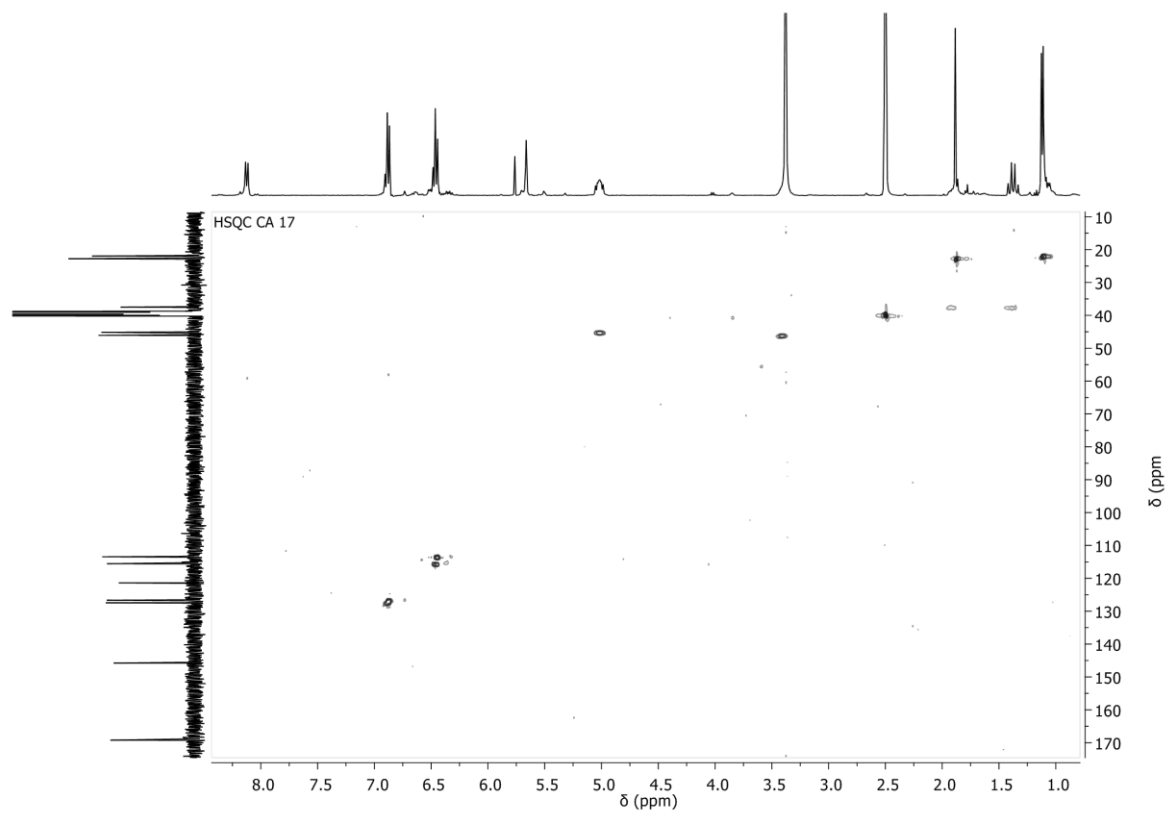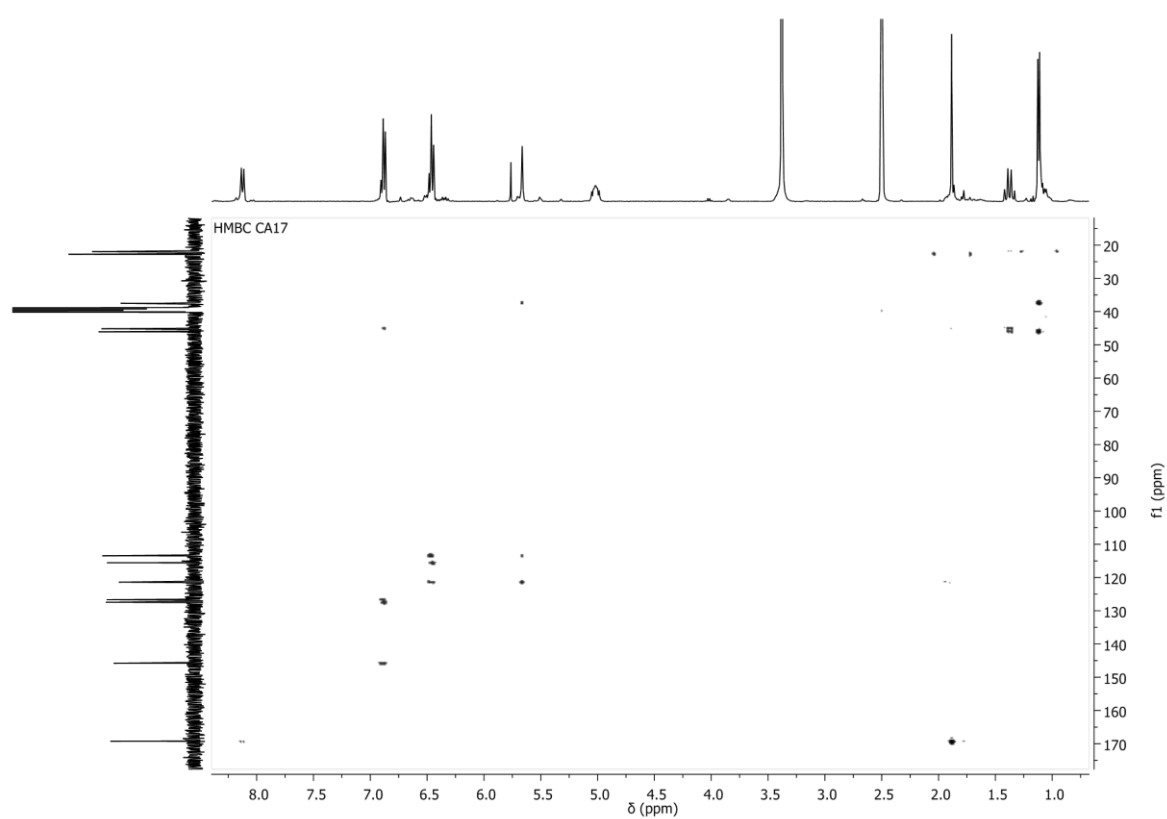

*N*-(6-Methoxy-2-methyl-1,2,3,4-tetrahydroquinolin-4-yl) acetamide, **3c**.

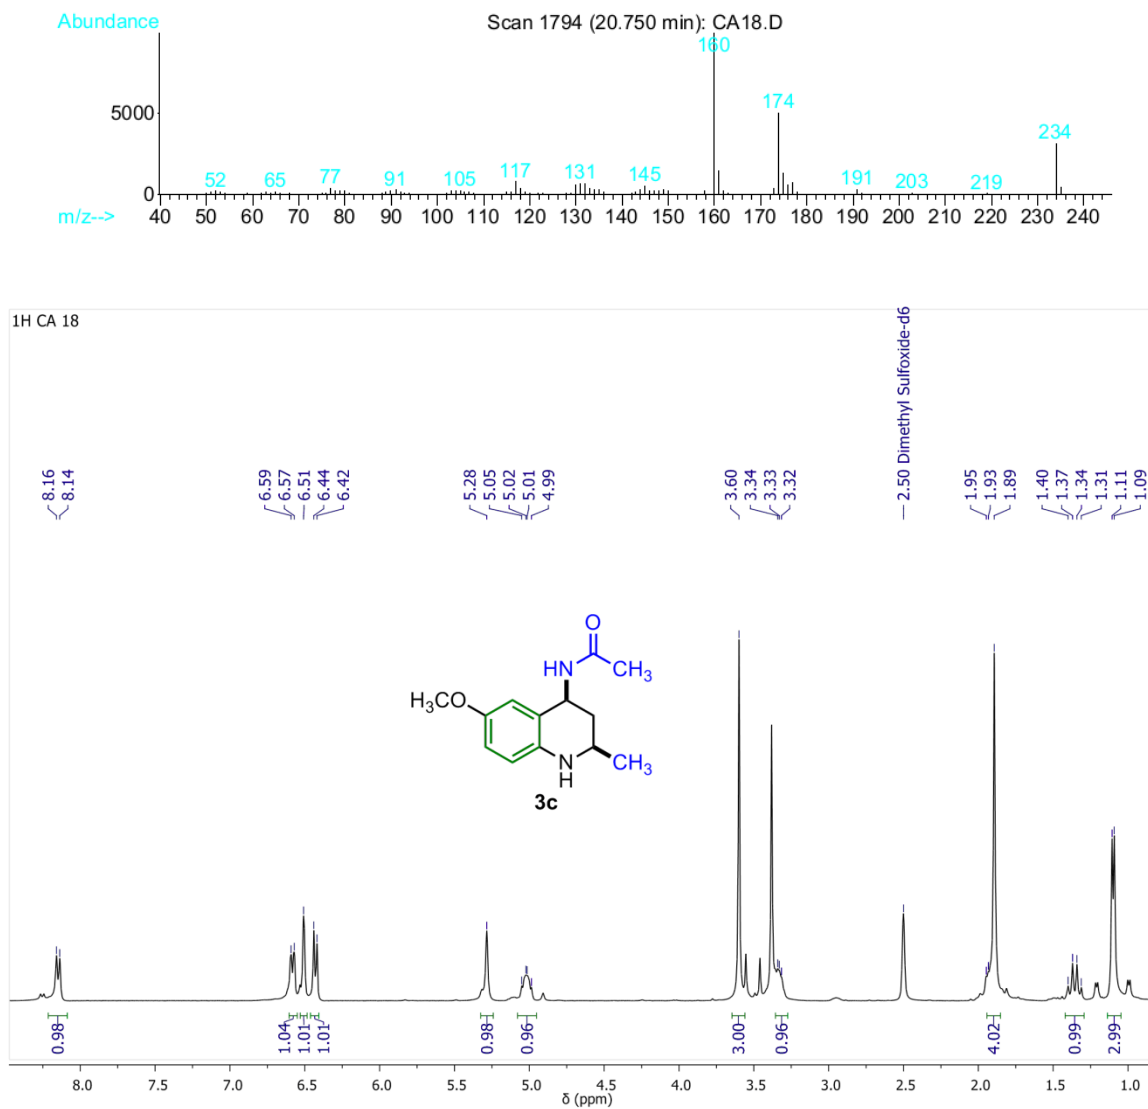



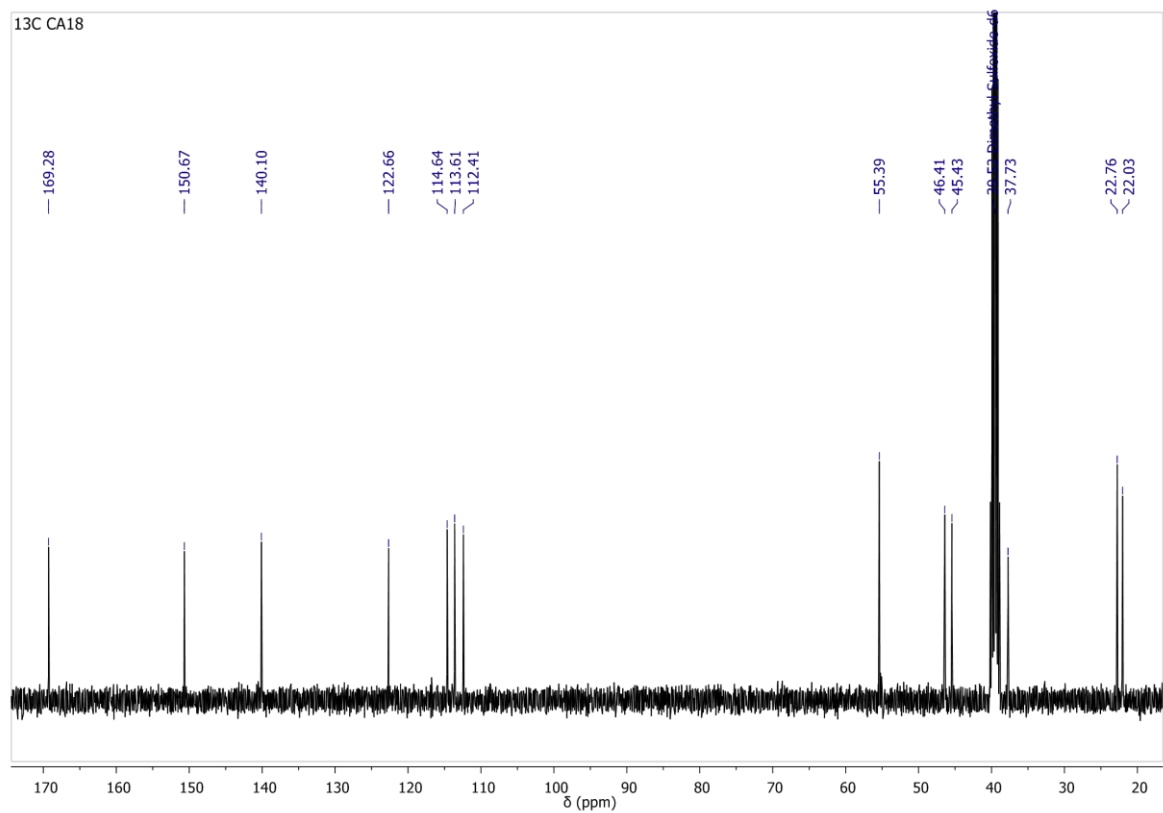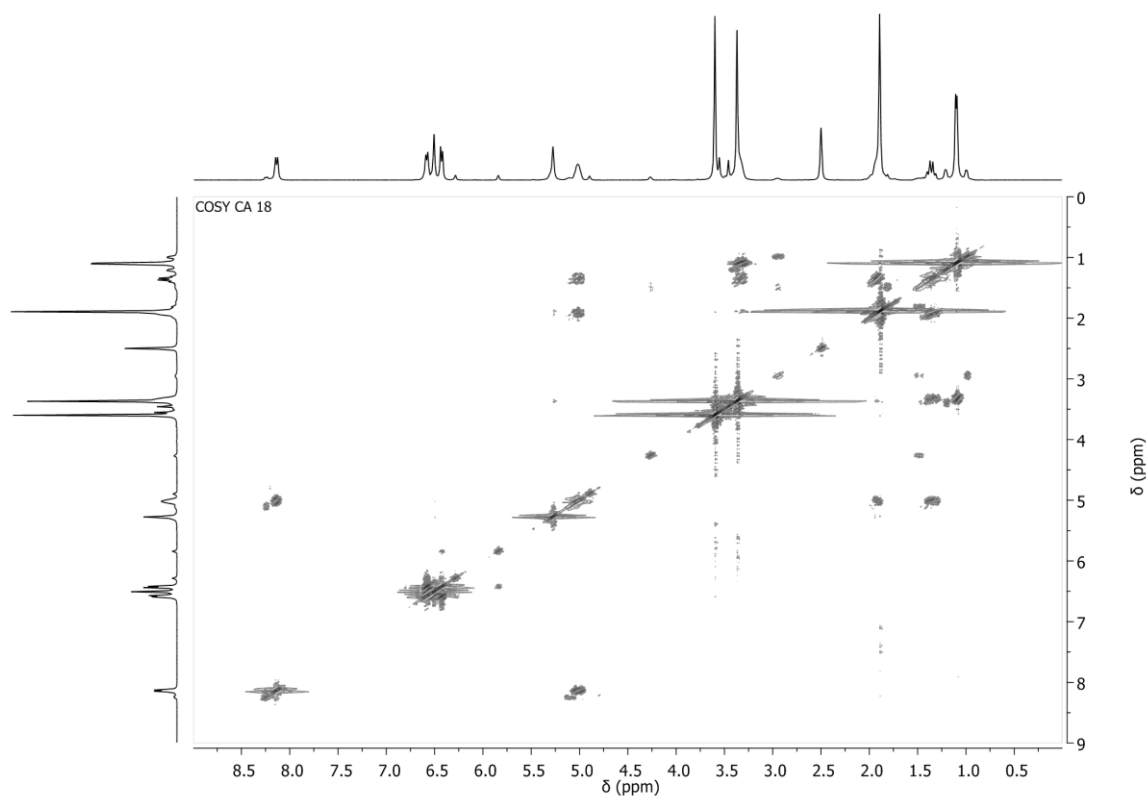

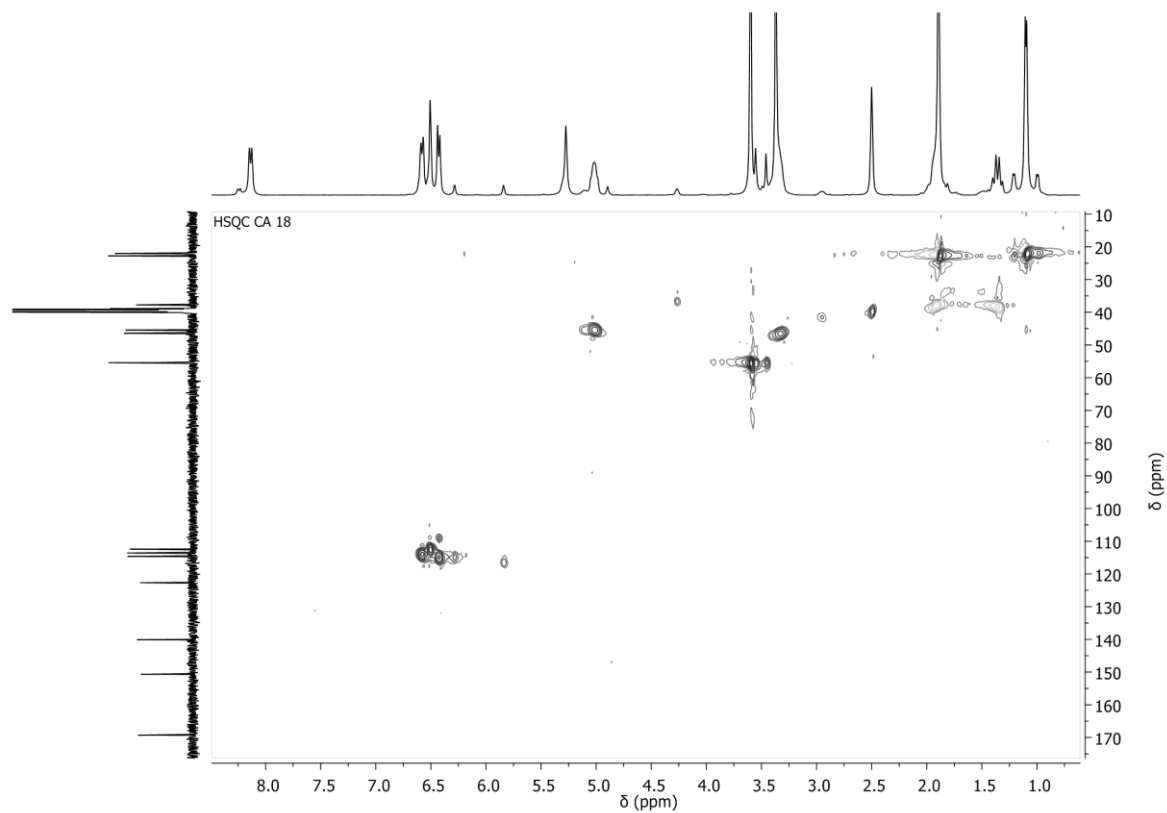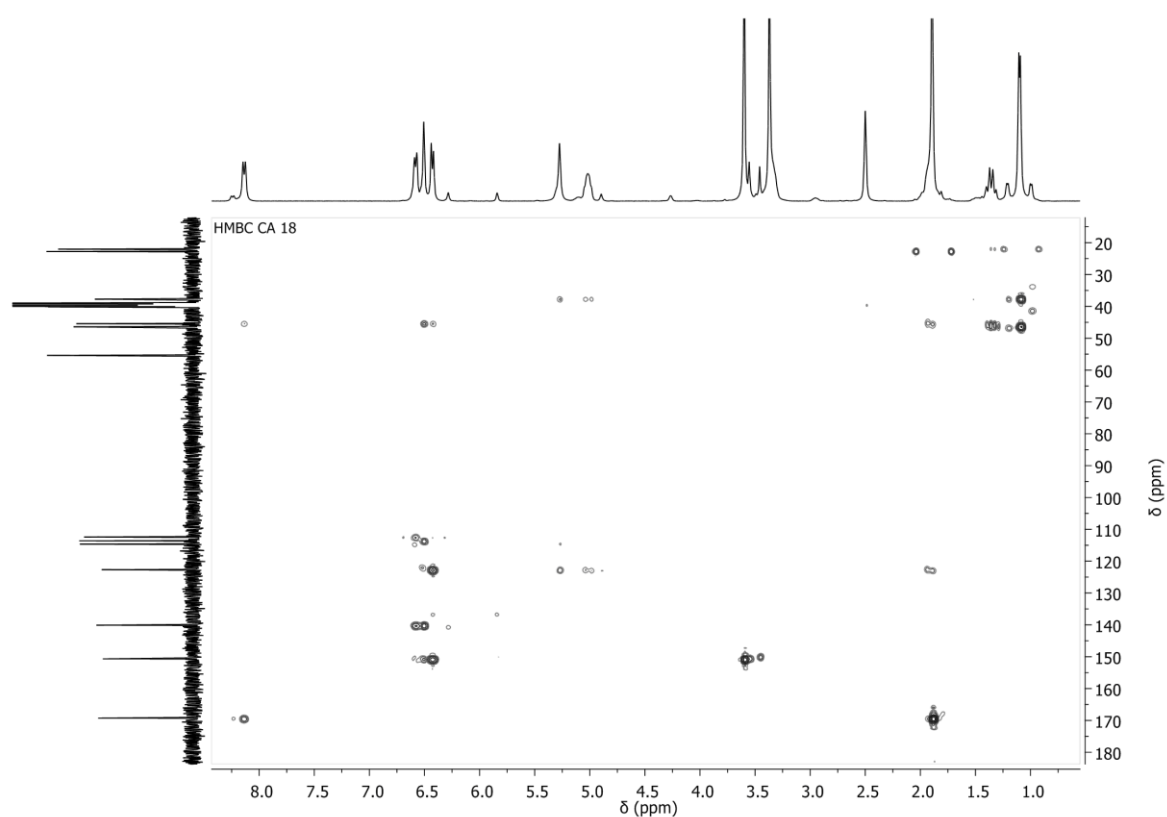

4-Acetamido-2-methyl-1,2,3,4-tetrahydroquinoline-6-carboxamide, **3d**.

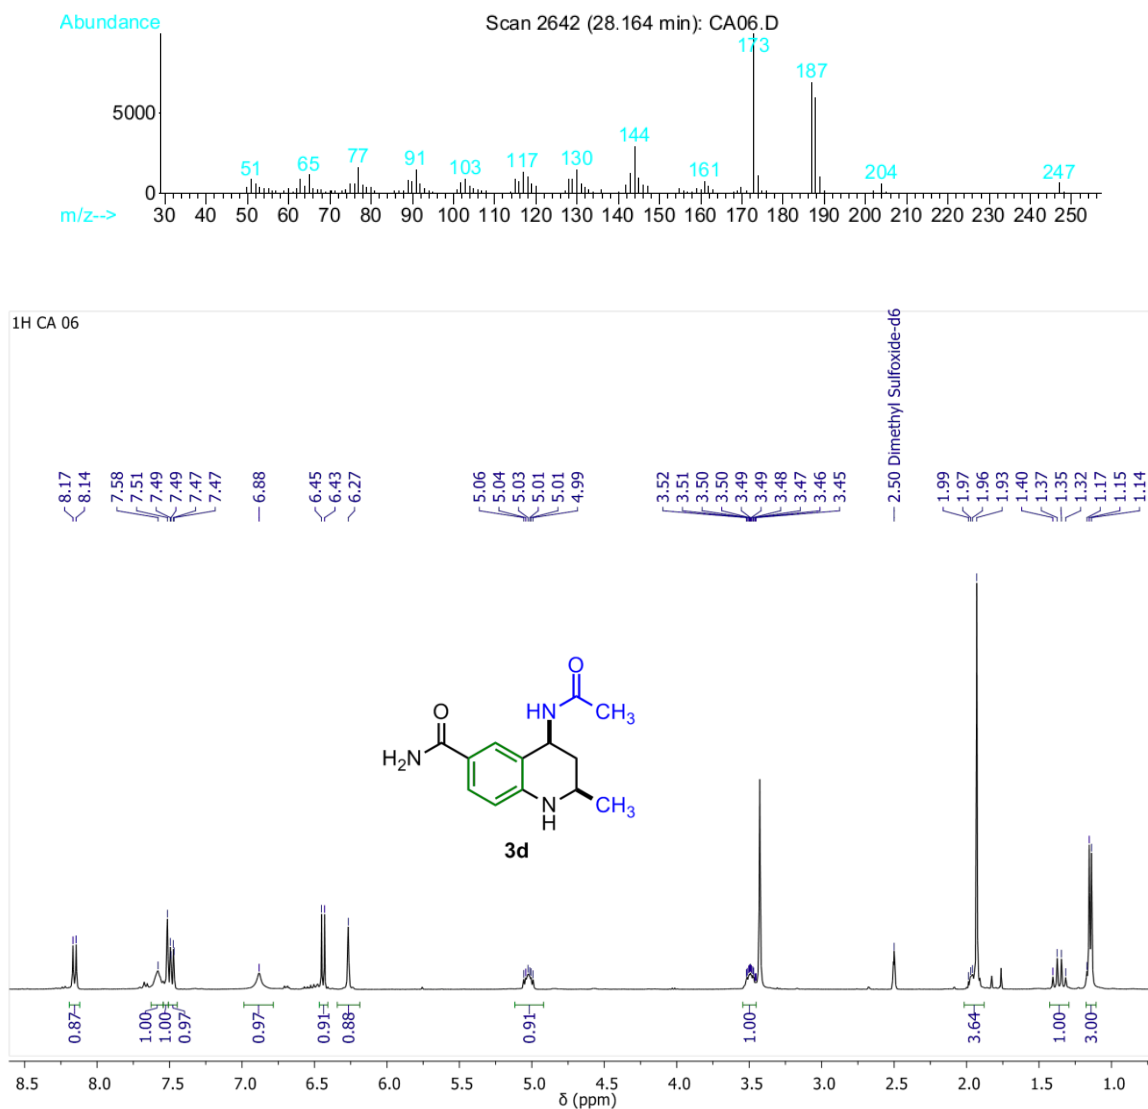

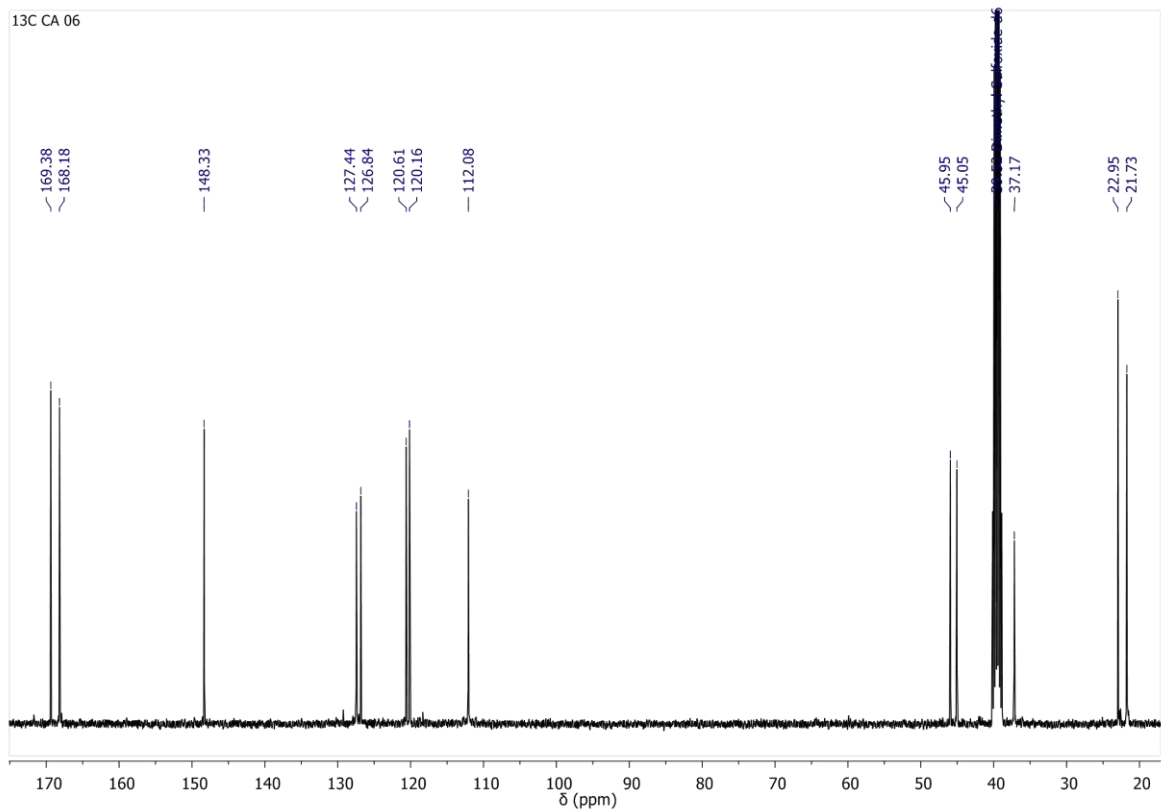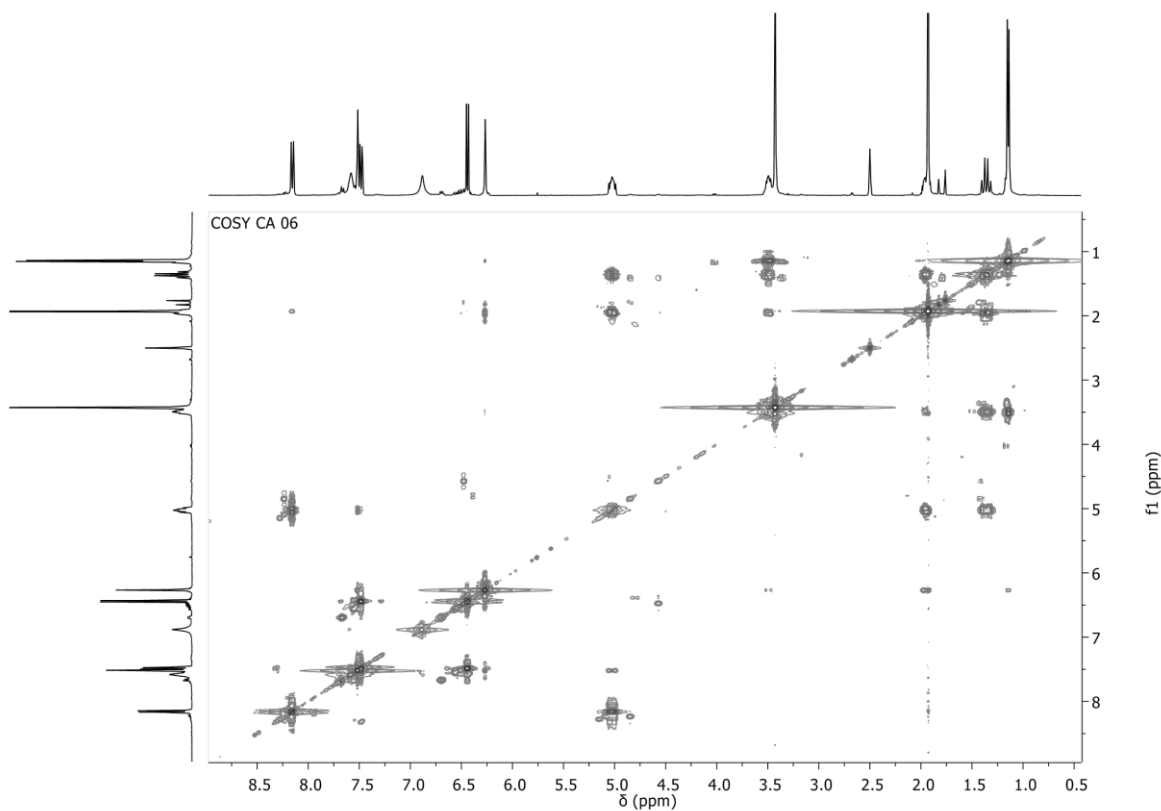

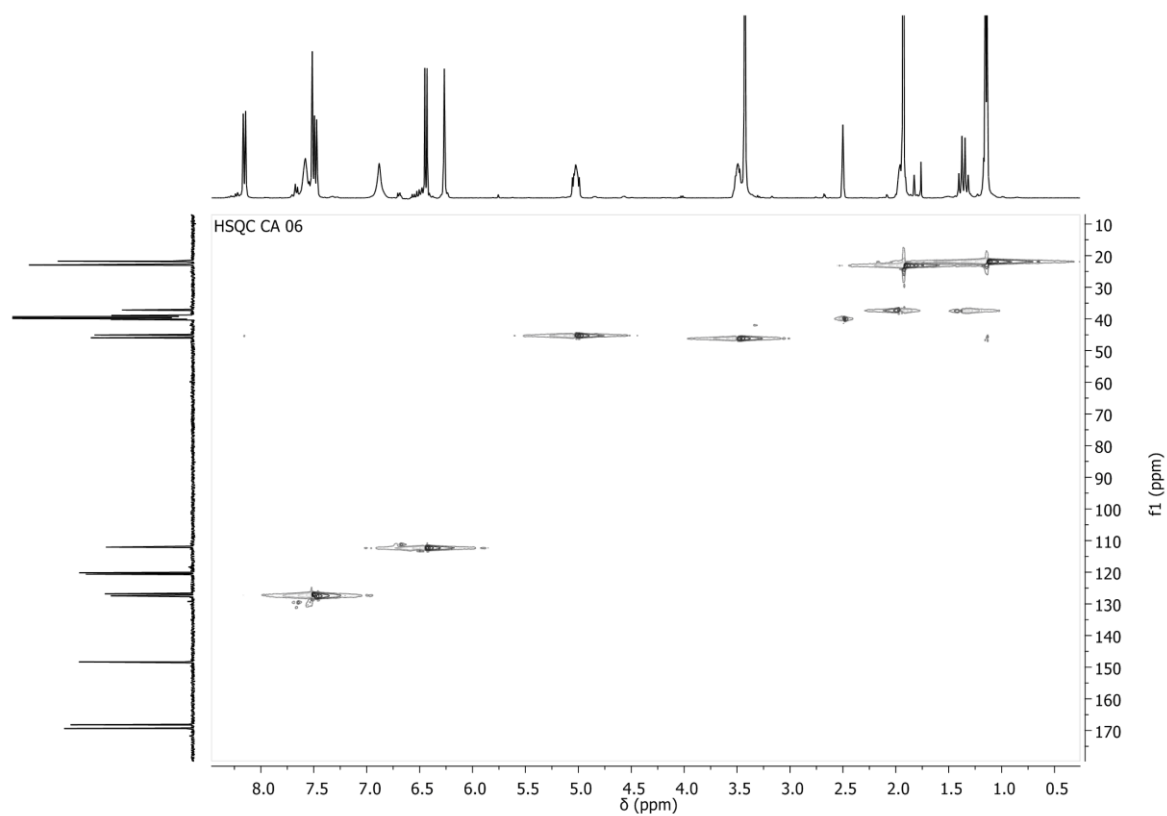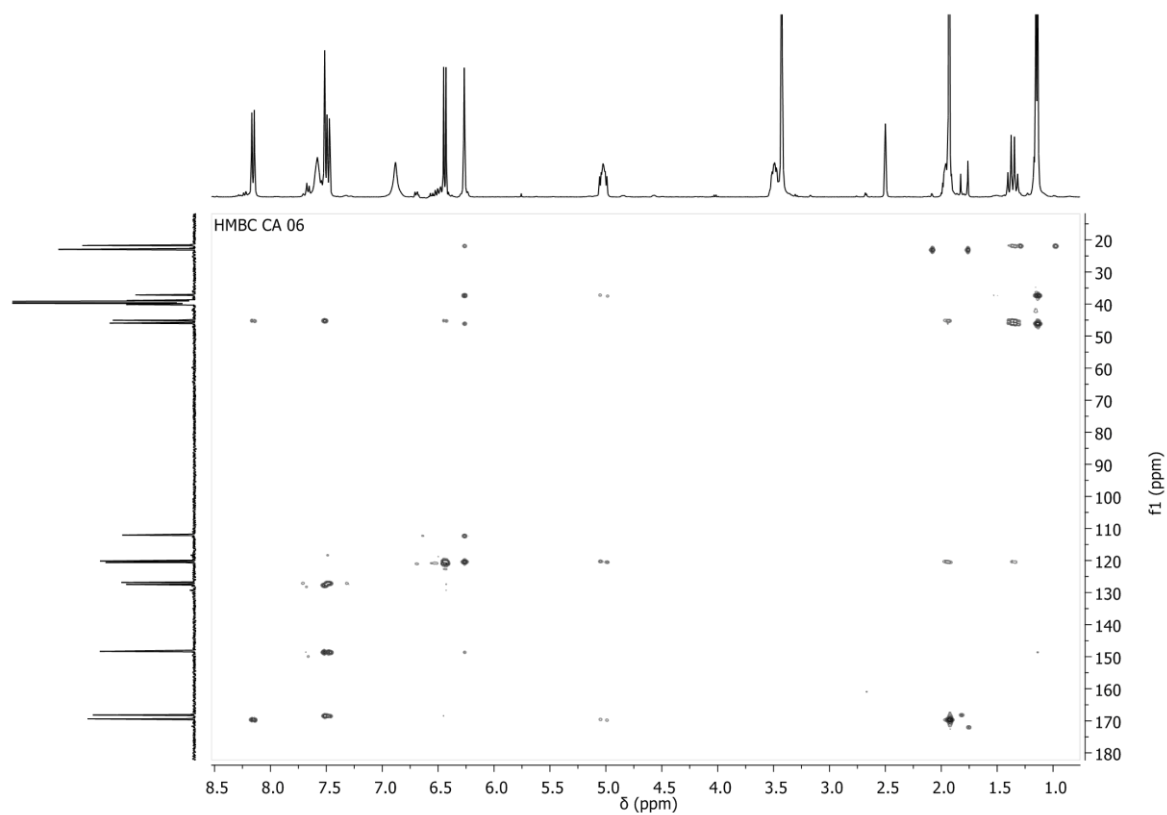

4-Acetamido-2-methyl-1,2,3,4-tetrahydroquinoline-6-carboxylic acid, **3e**.

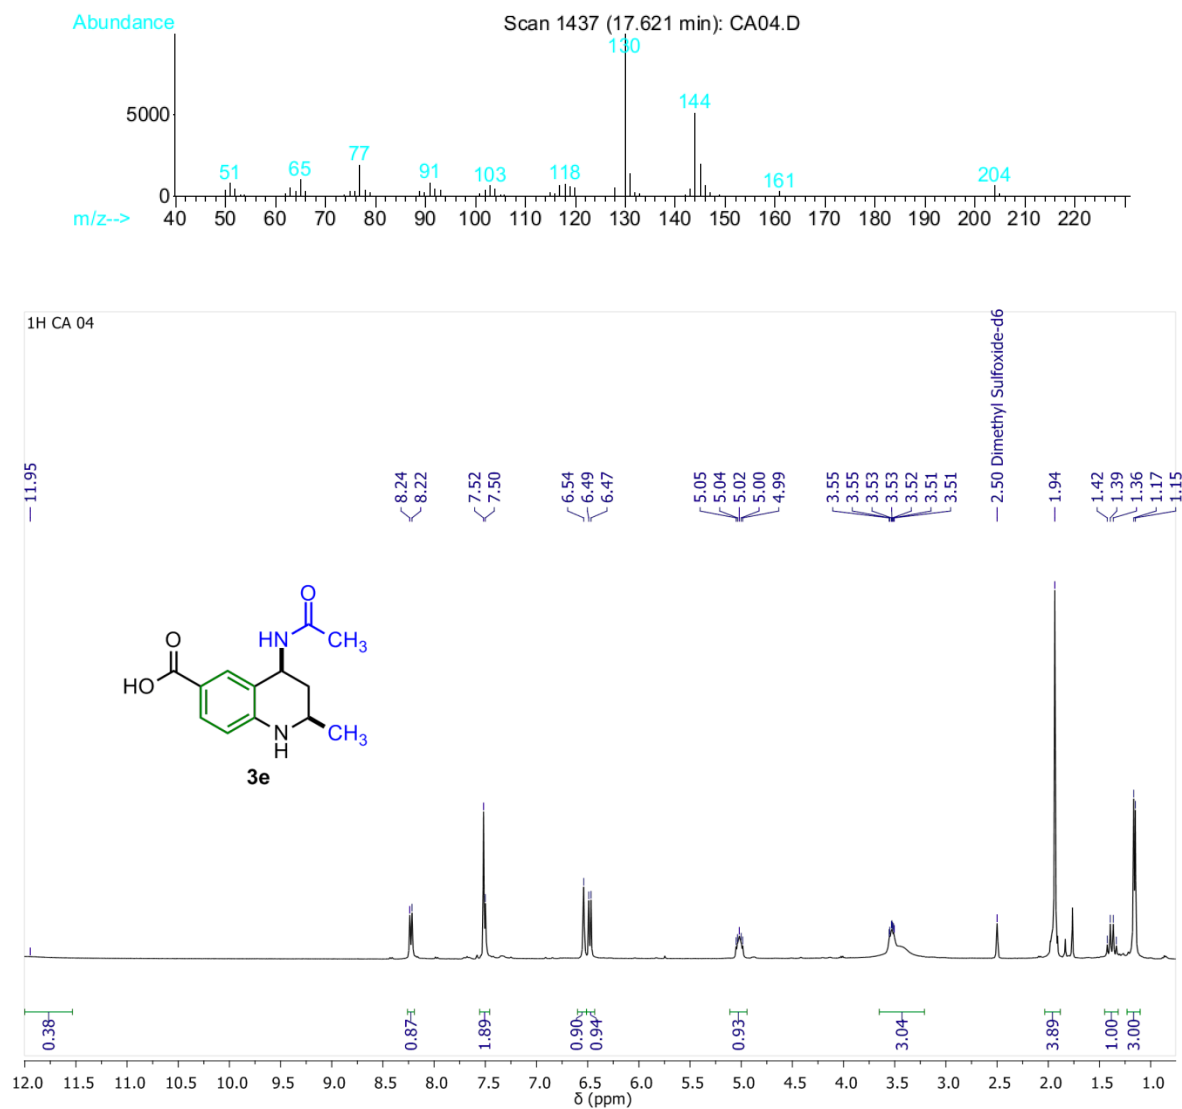

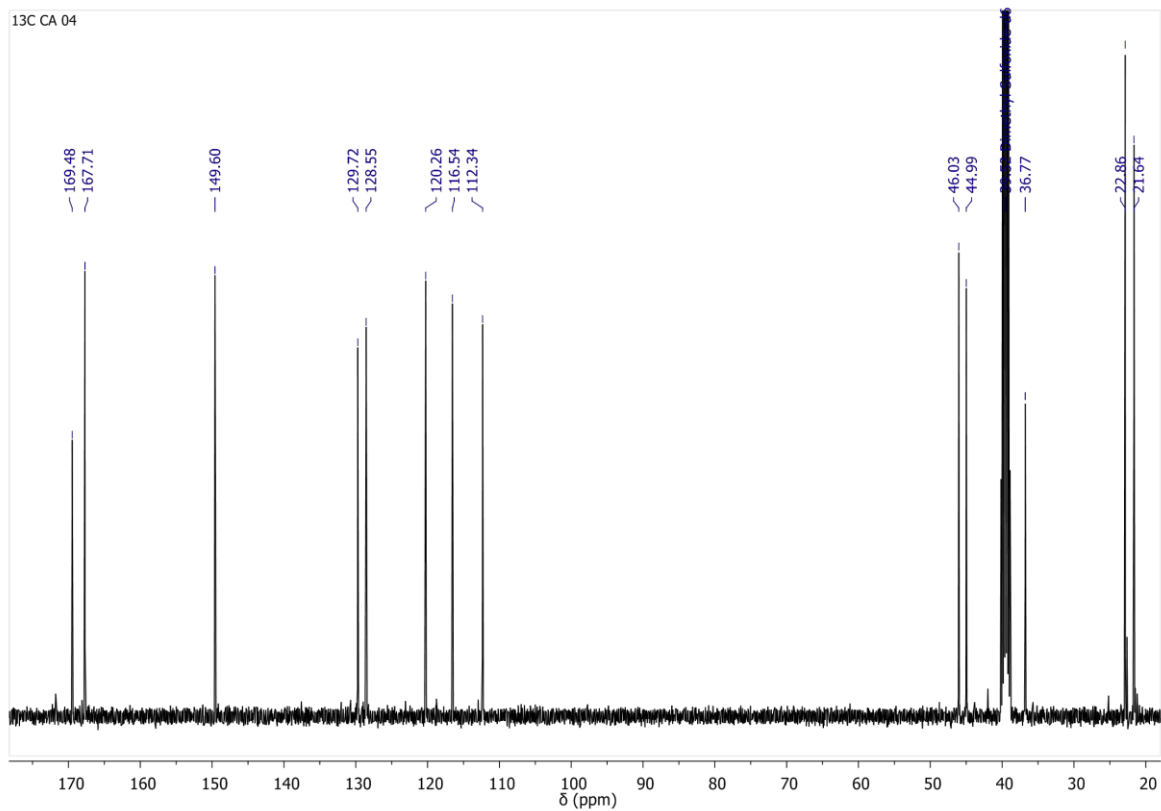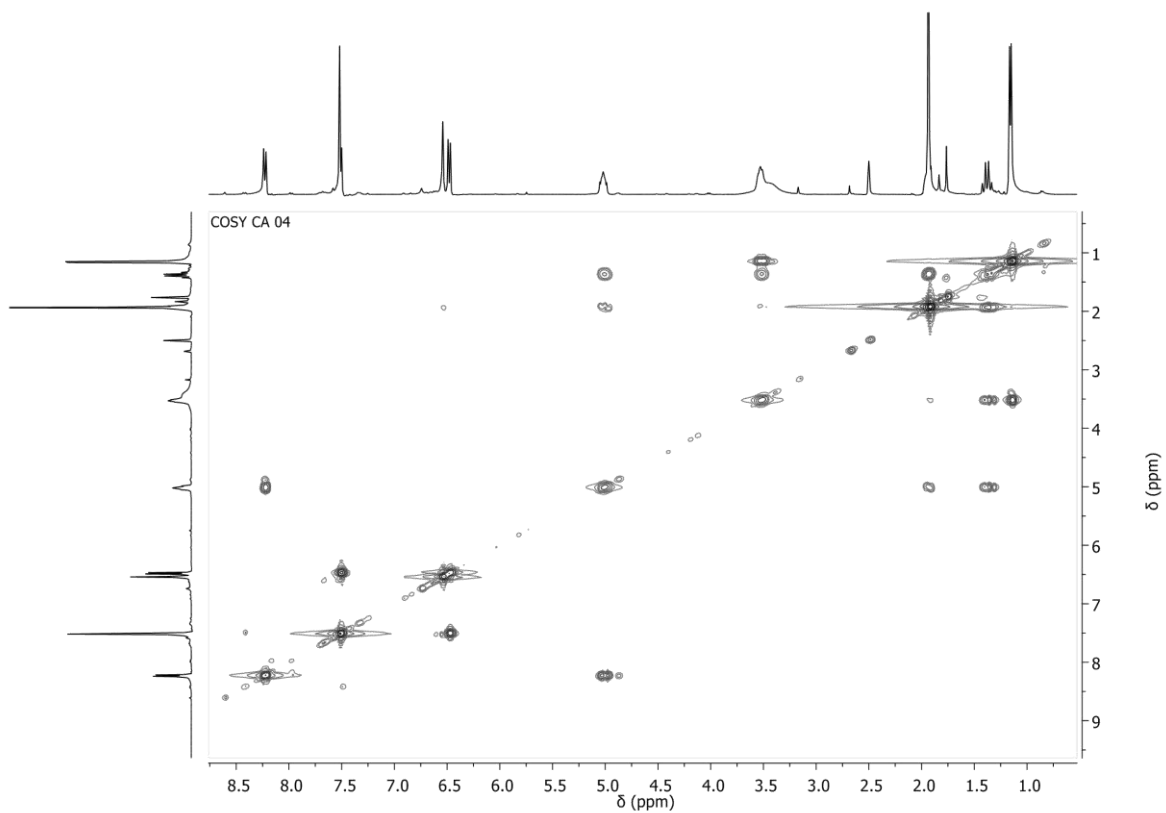

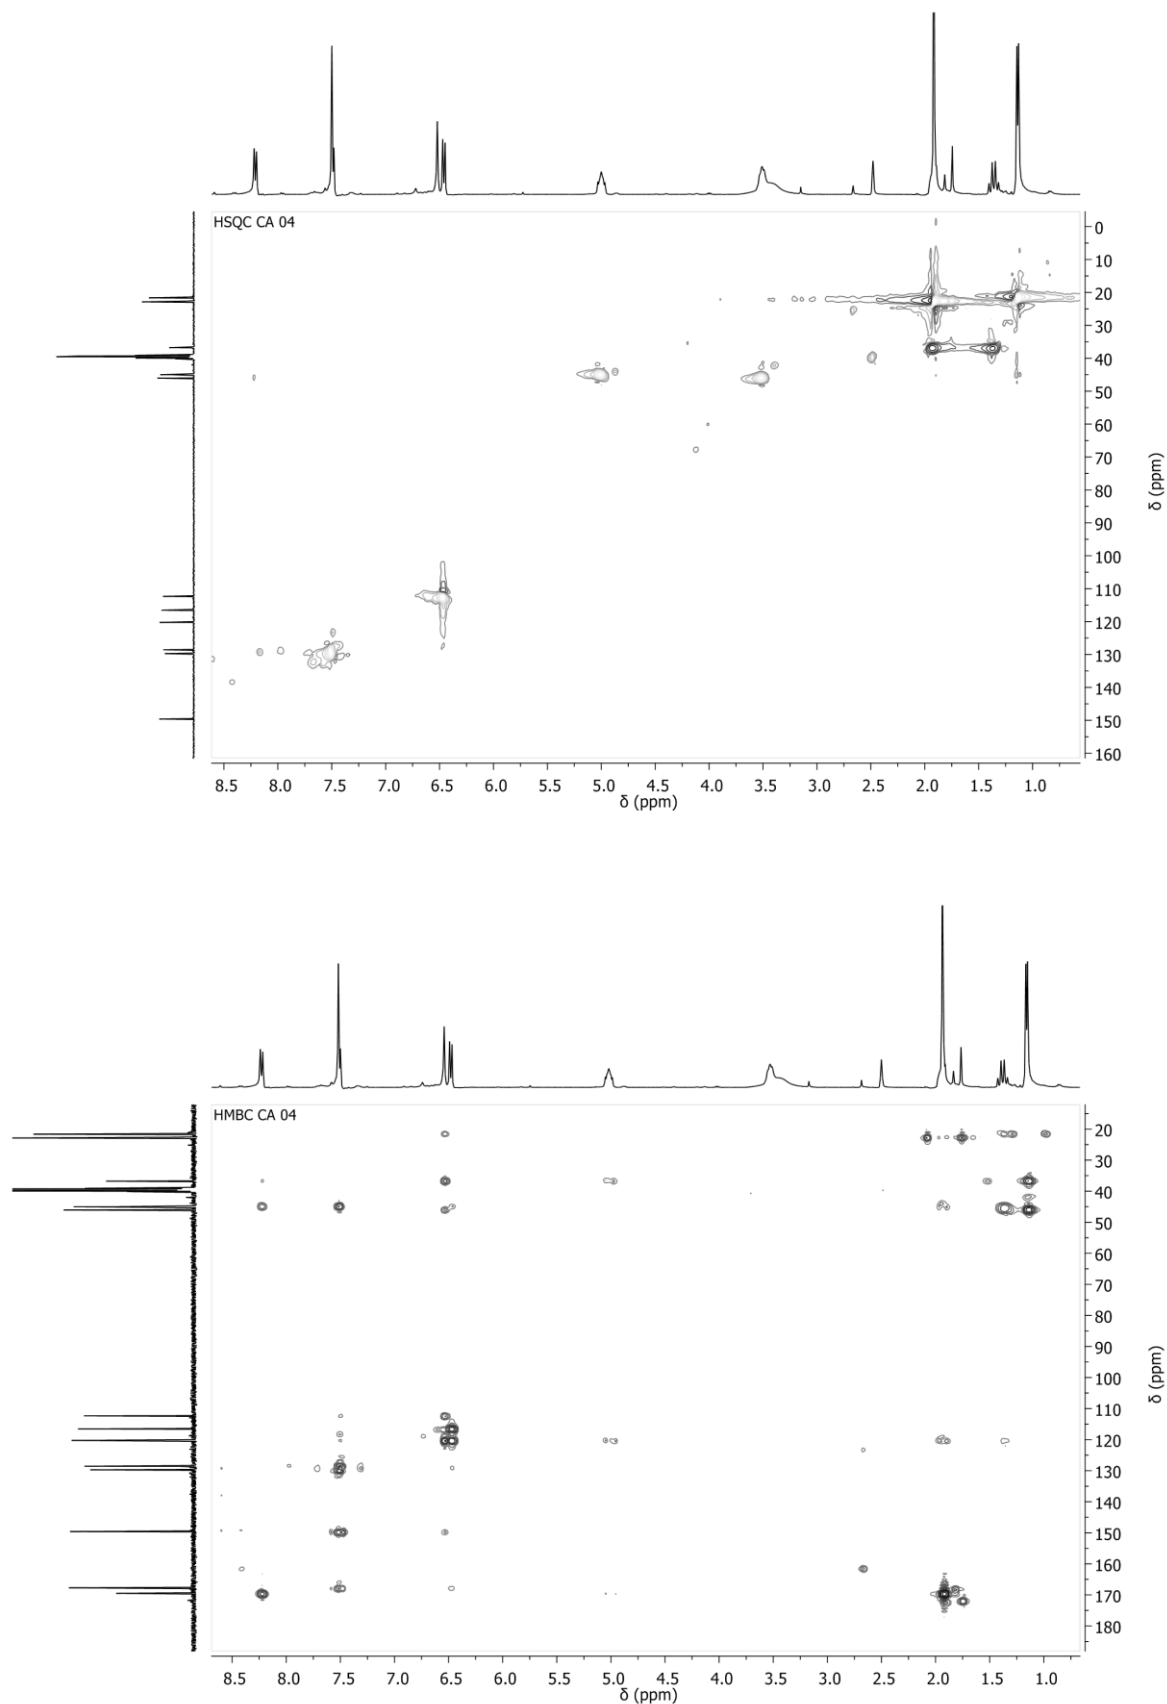



*N*-(6-Acetyl-2-methyl-1,2,3,4-tetrahydroquinolin-4-yl) formamide, **3f**.

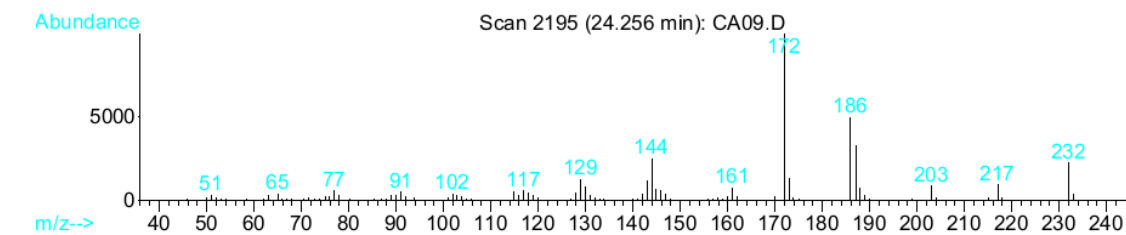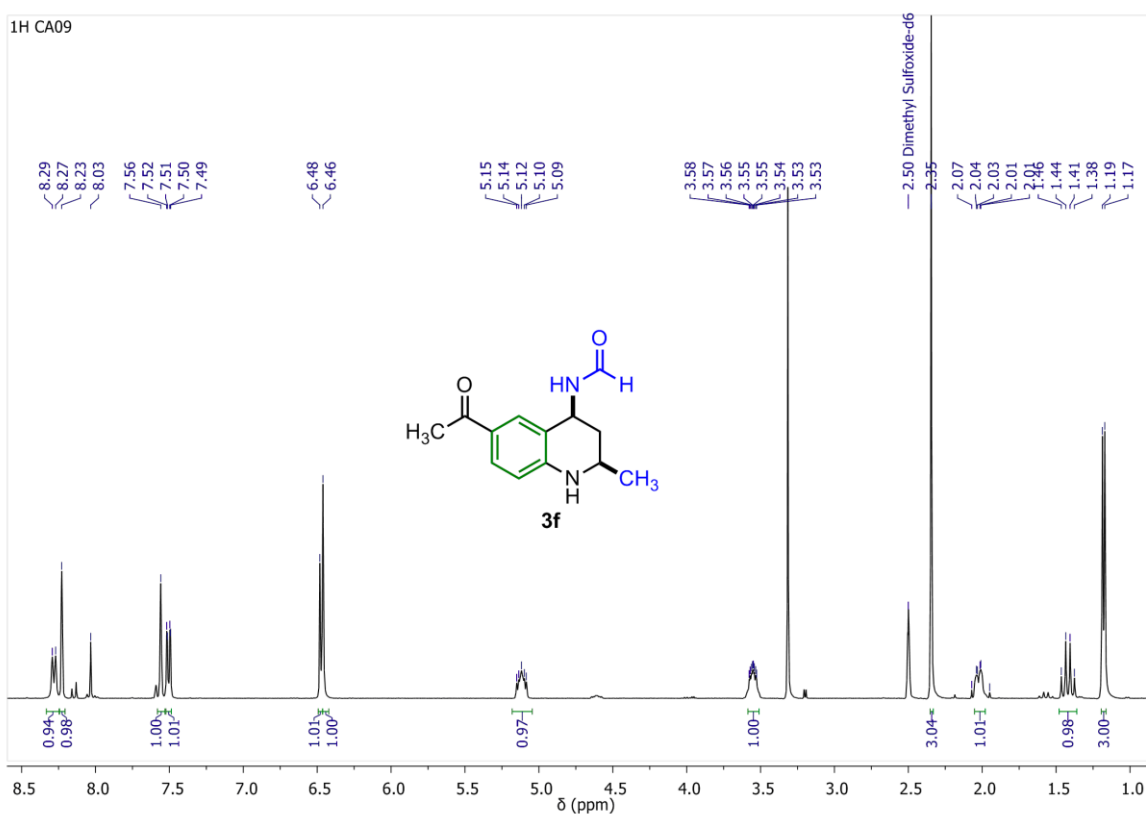

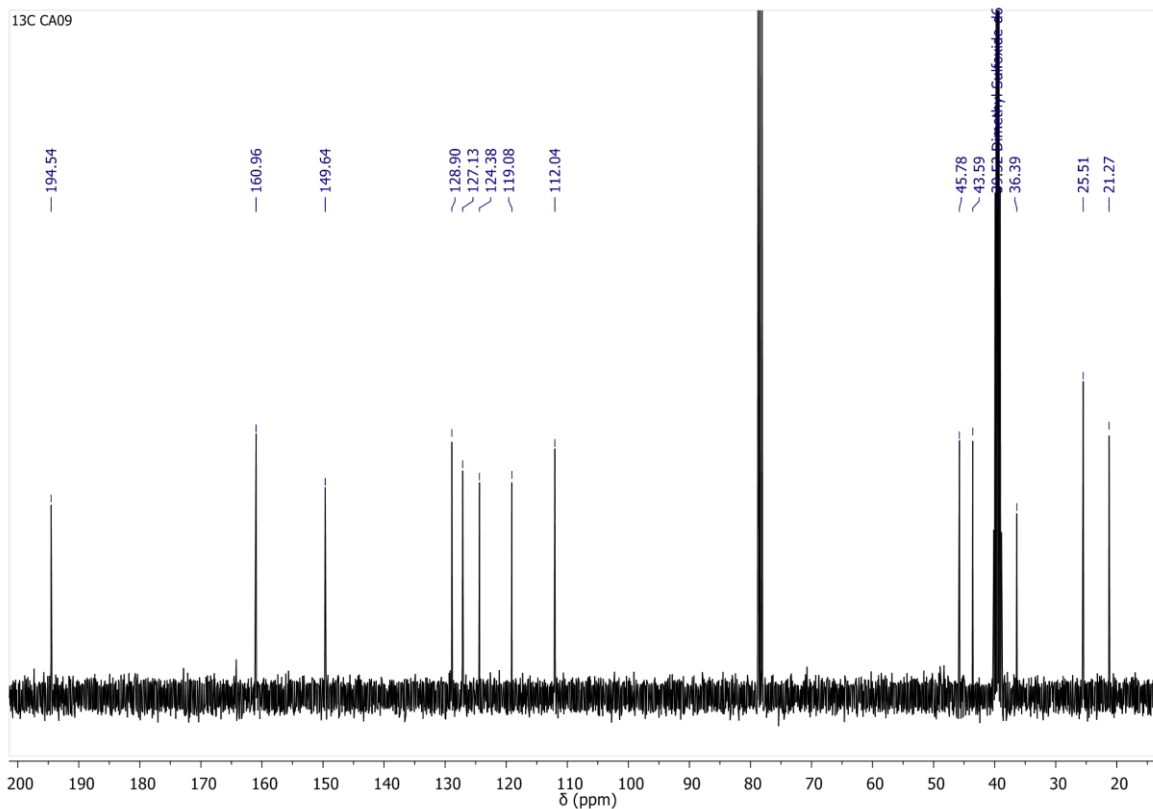

*N*-(2-Methyl-1,2,3,4-tetrahydroquinolin-4-yl) formamide, **3g**.

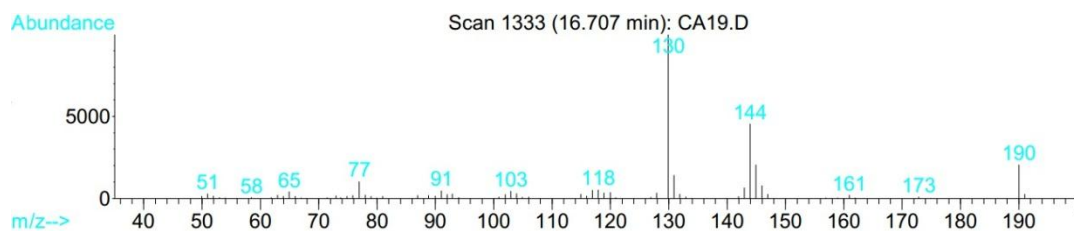

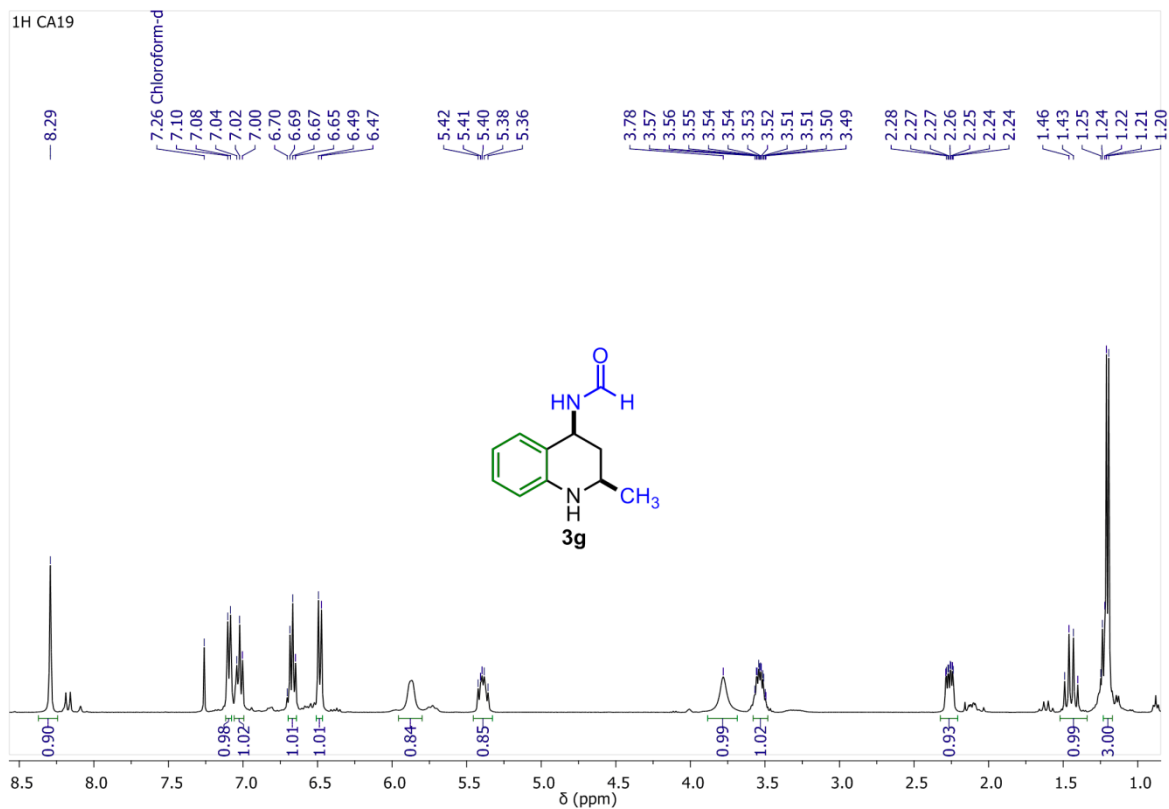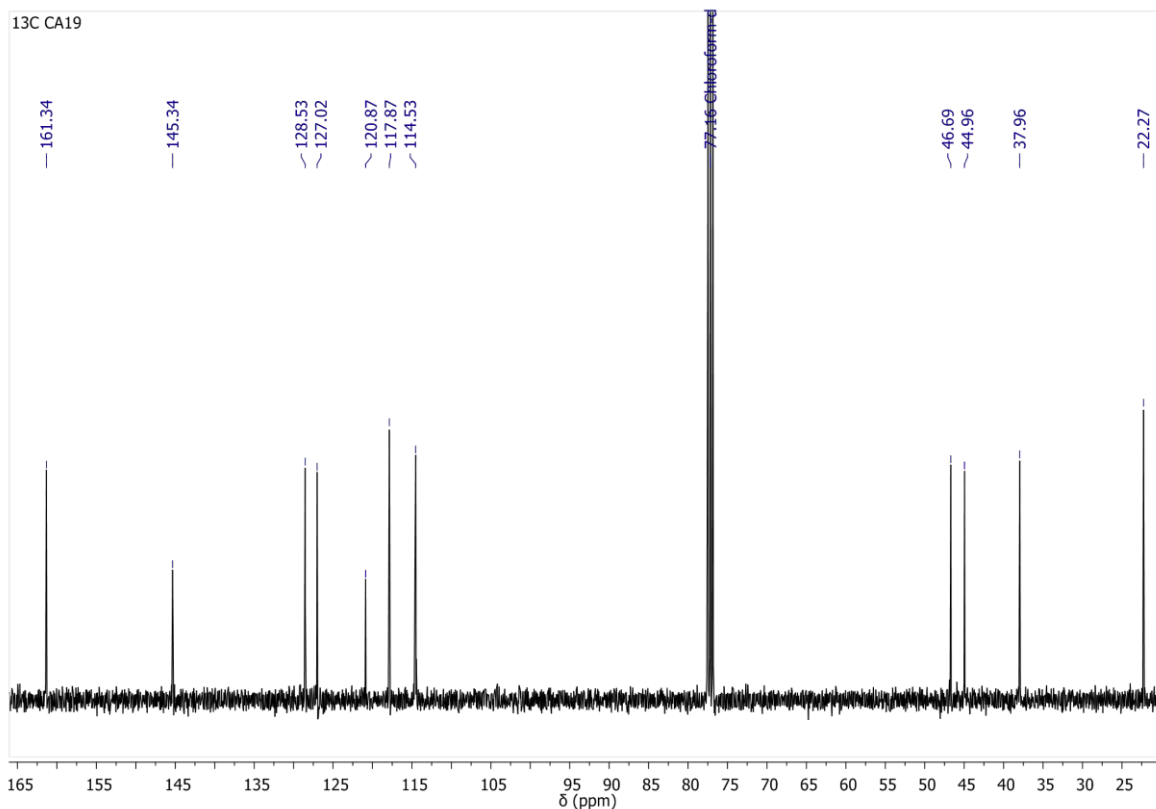

*N*-(6-Methoxy-2-methyl-1,2,3,4-tetrahydroquinolin-4-yl) formamide, **3h**.

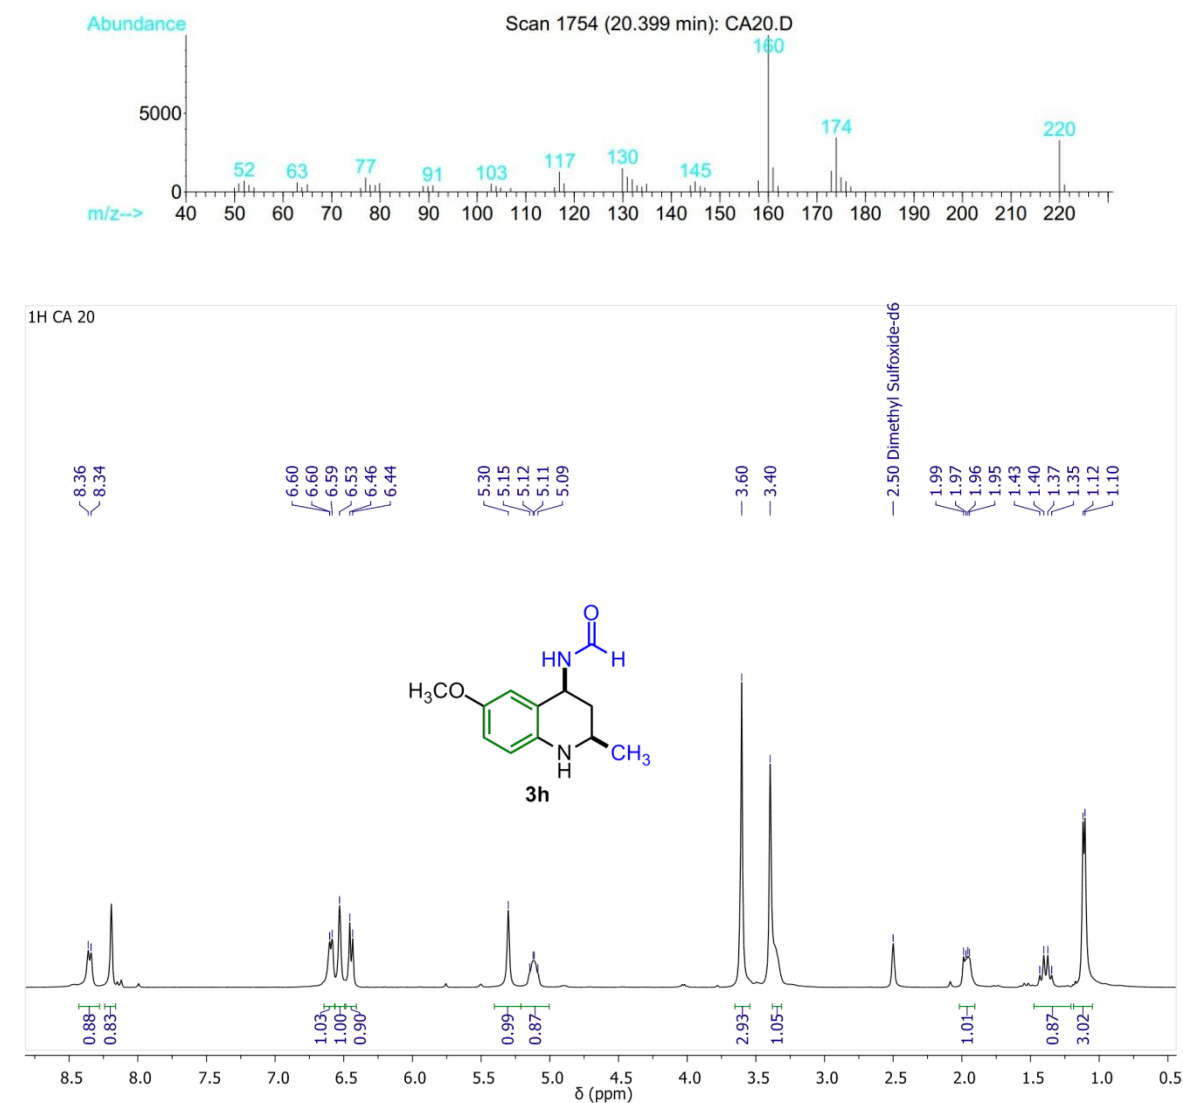

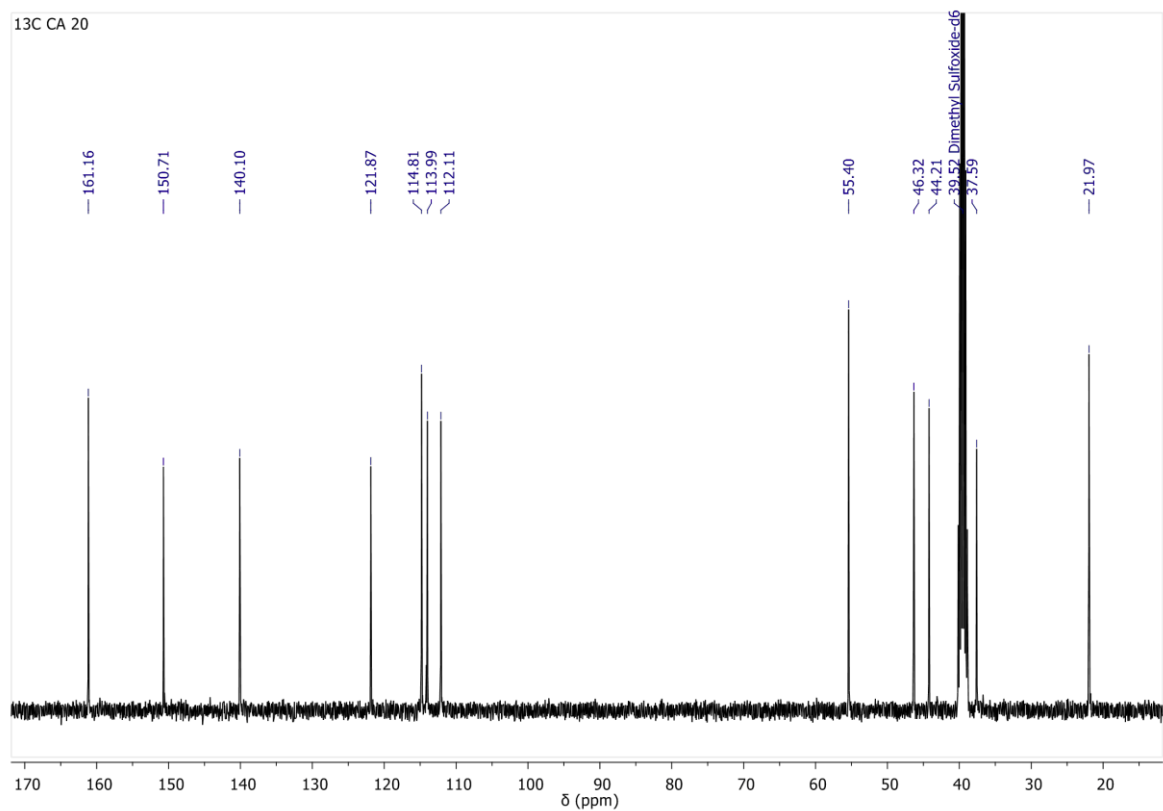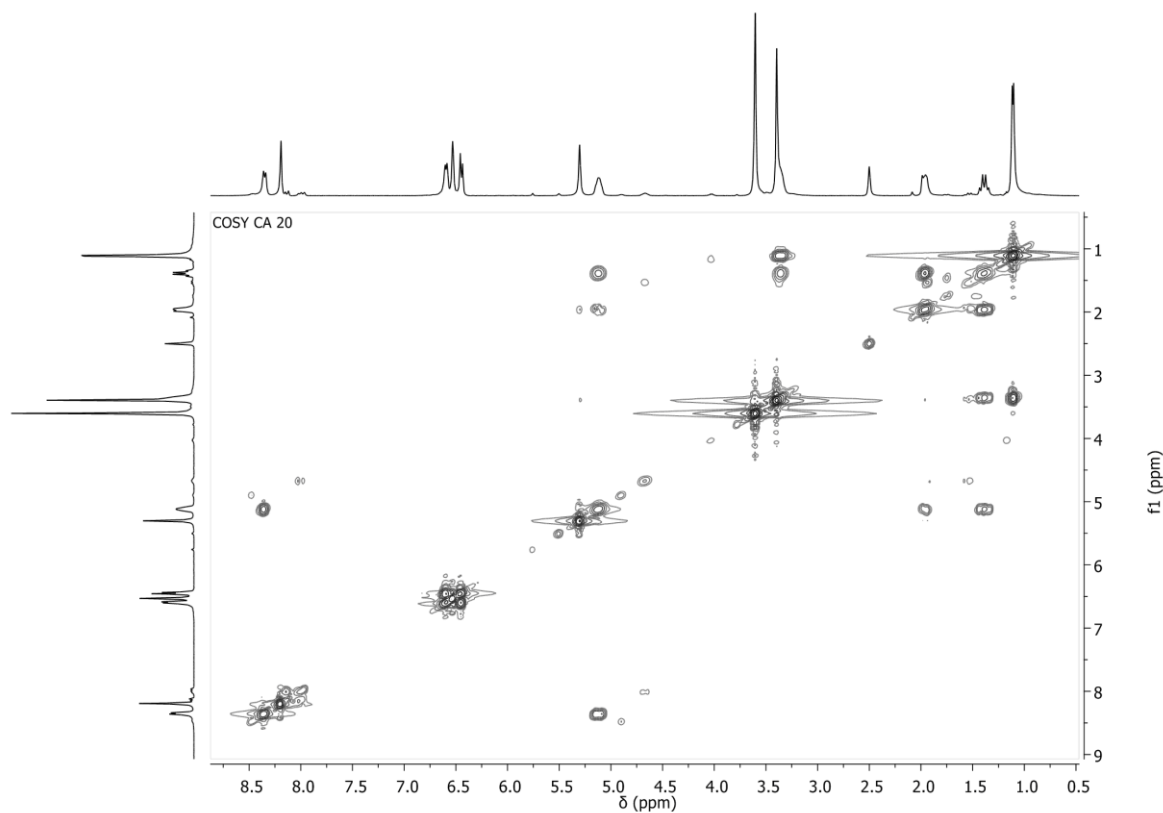

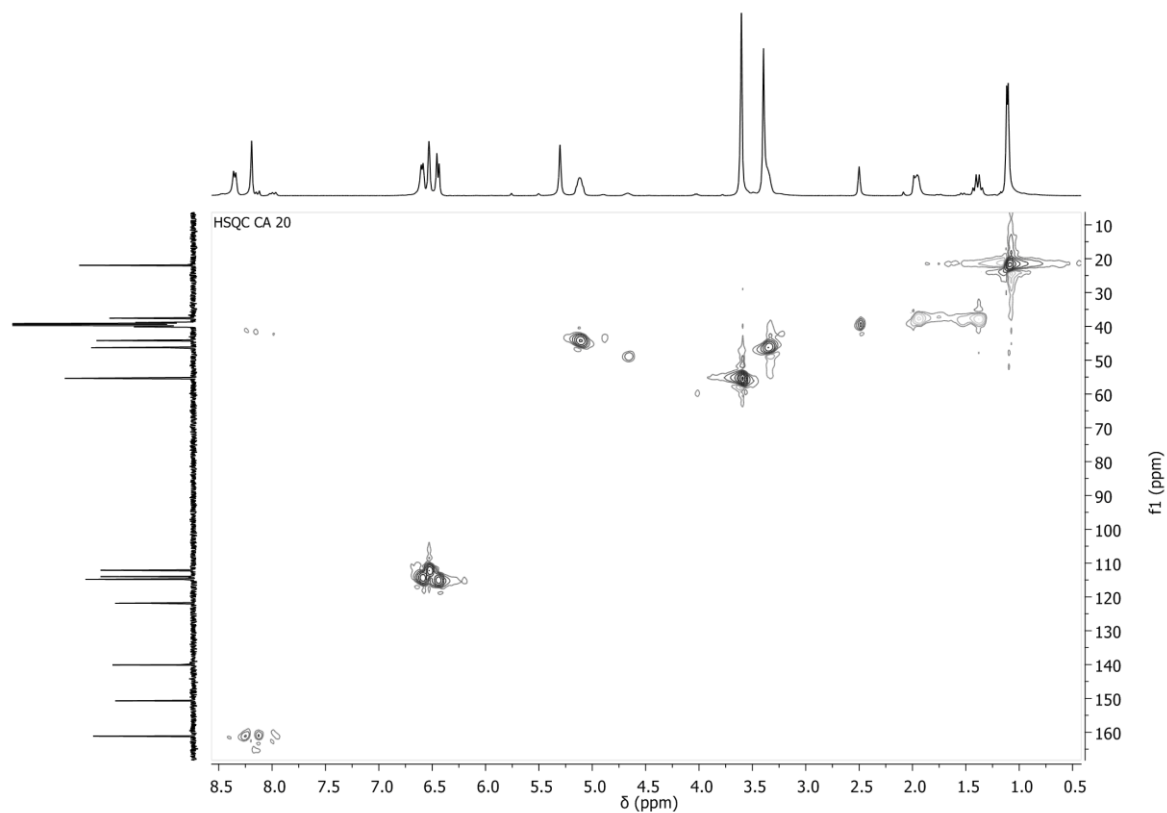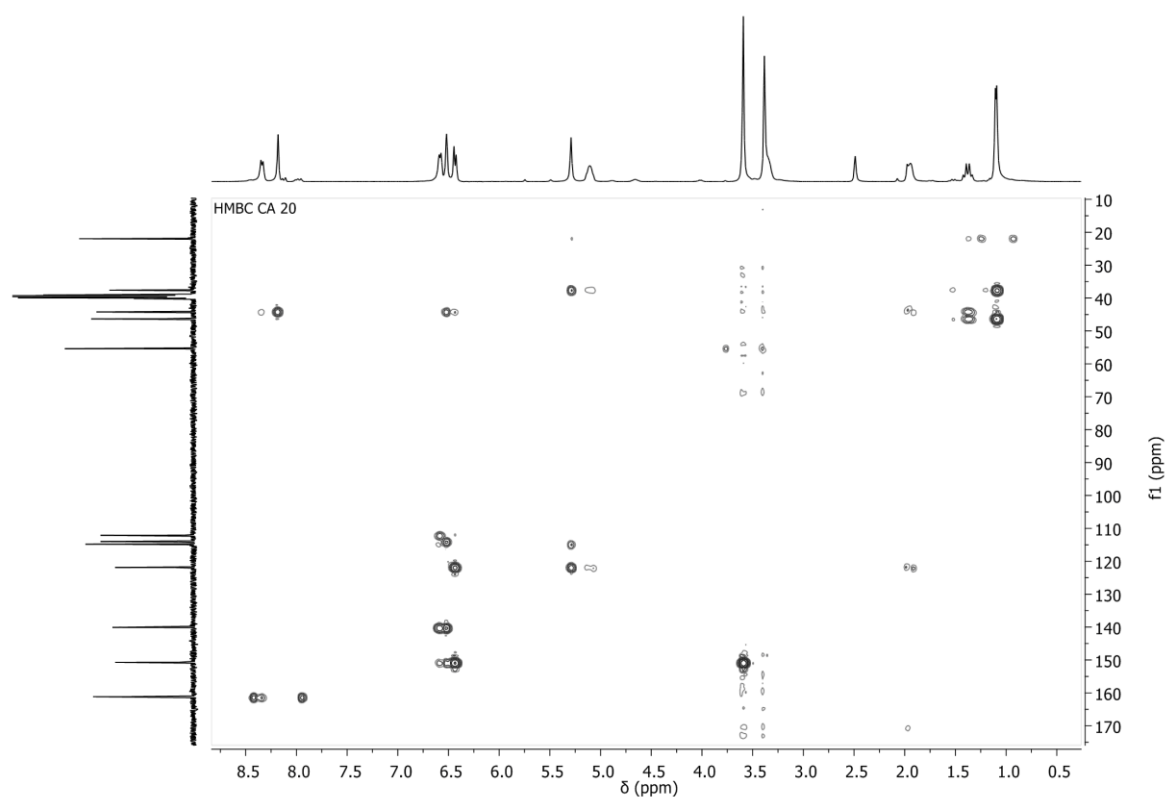

4-Formamido-2-methyl-1,2,3,4-tetrahydroquinoline-6-carboxamide, **3i**.

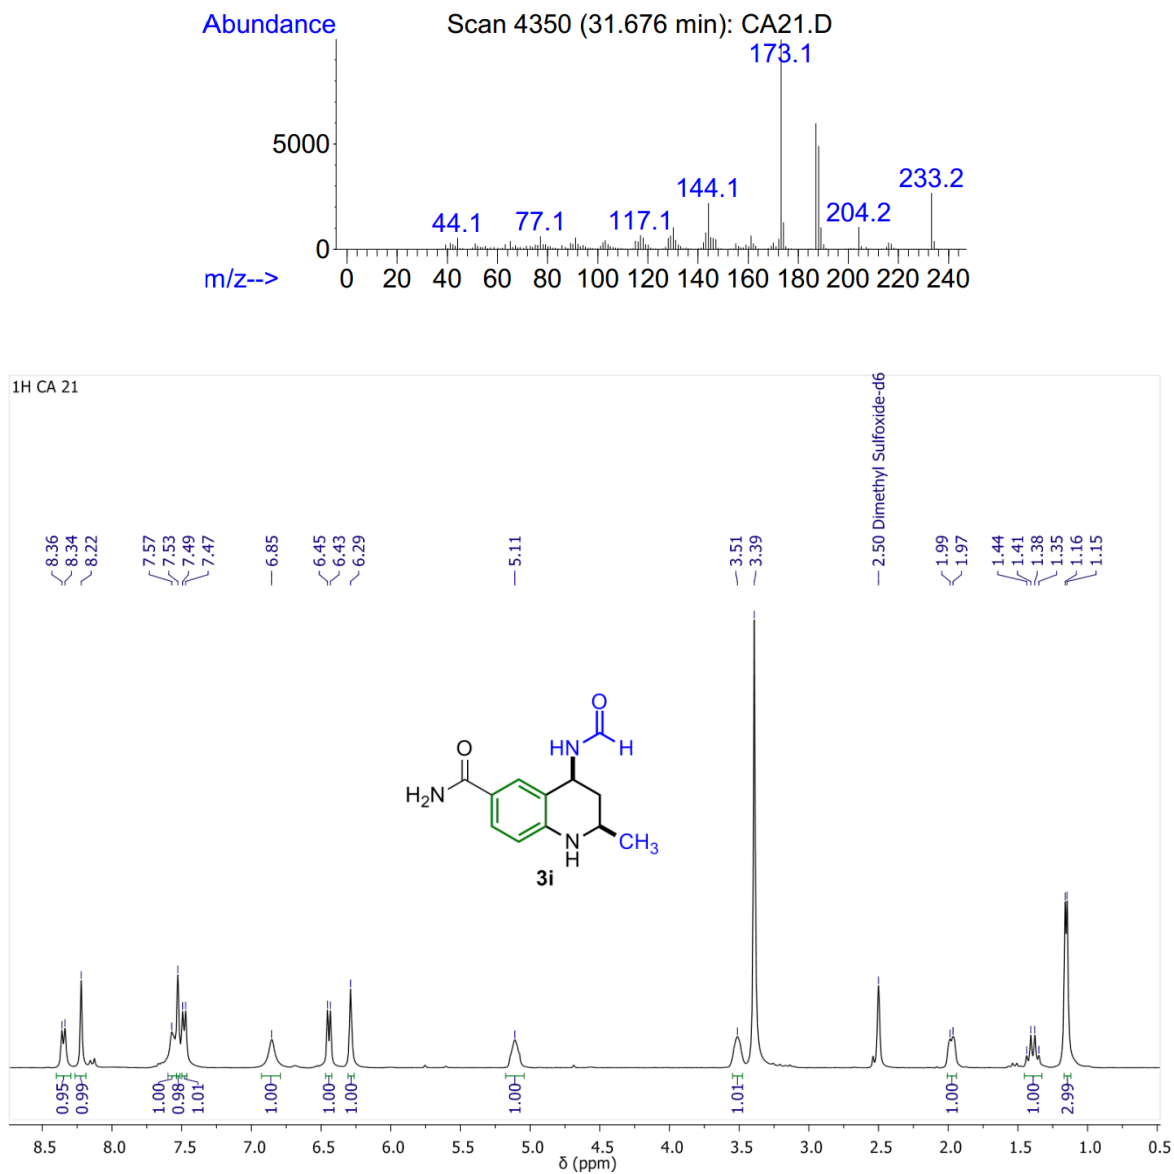

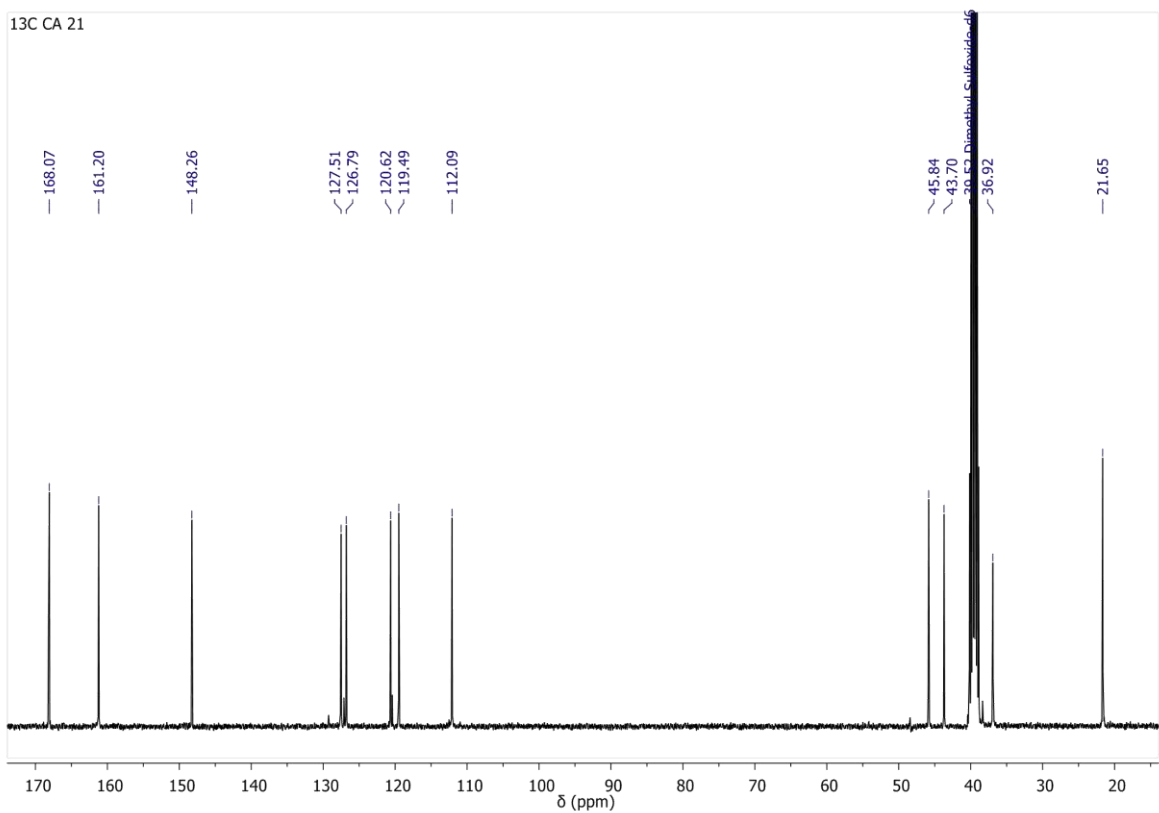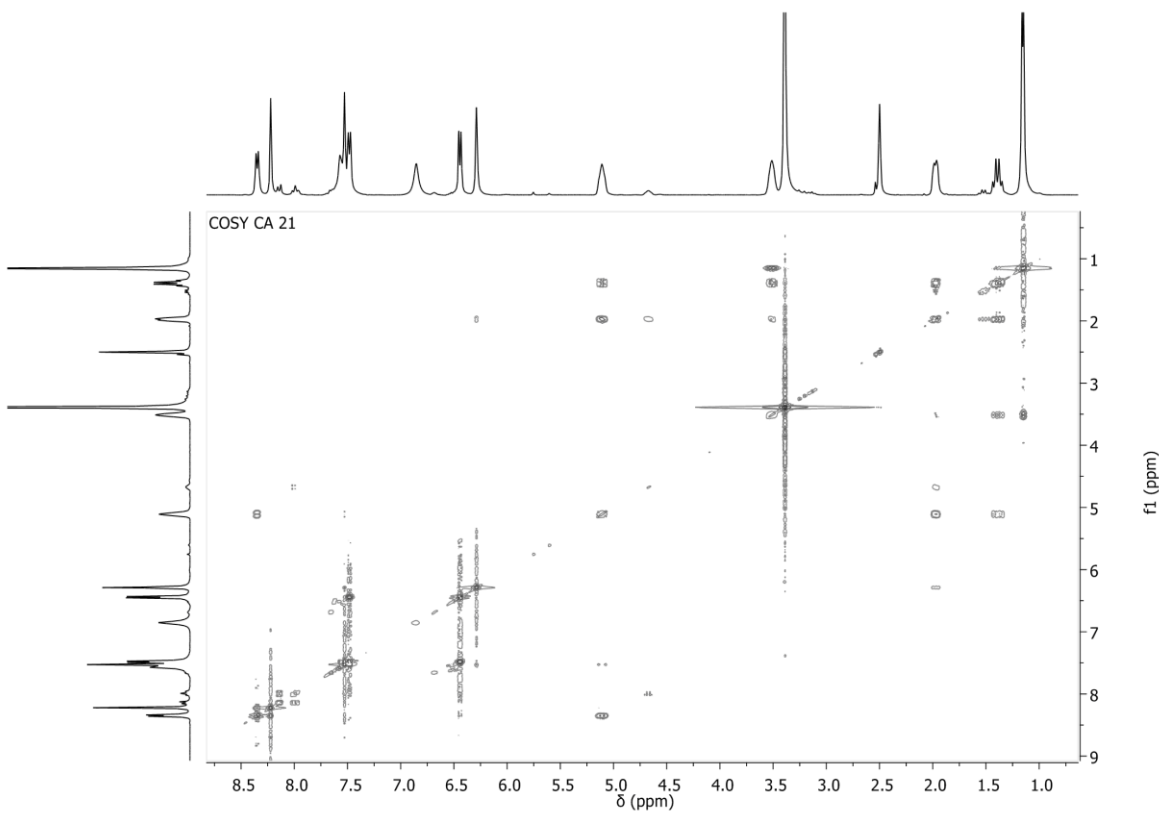



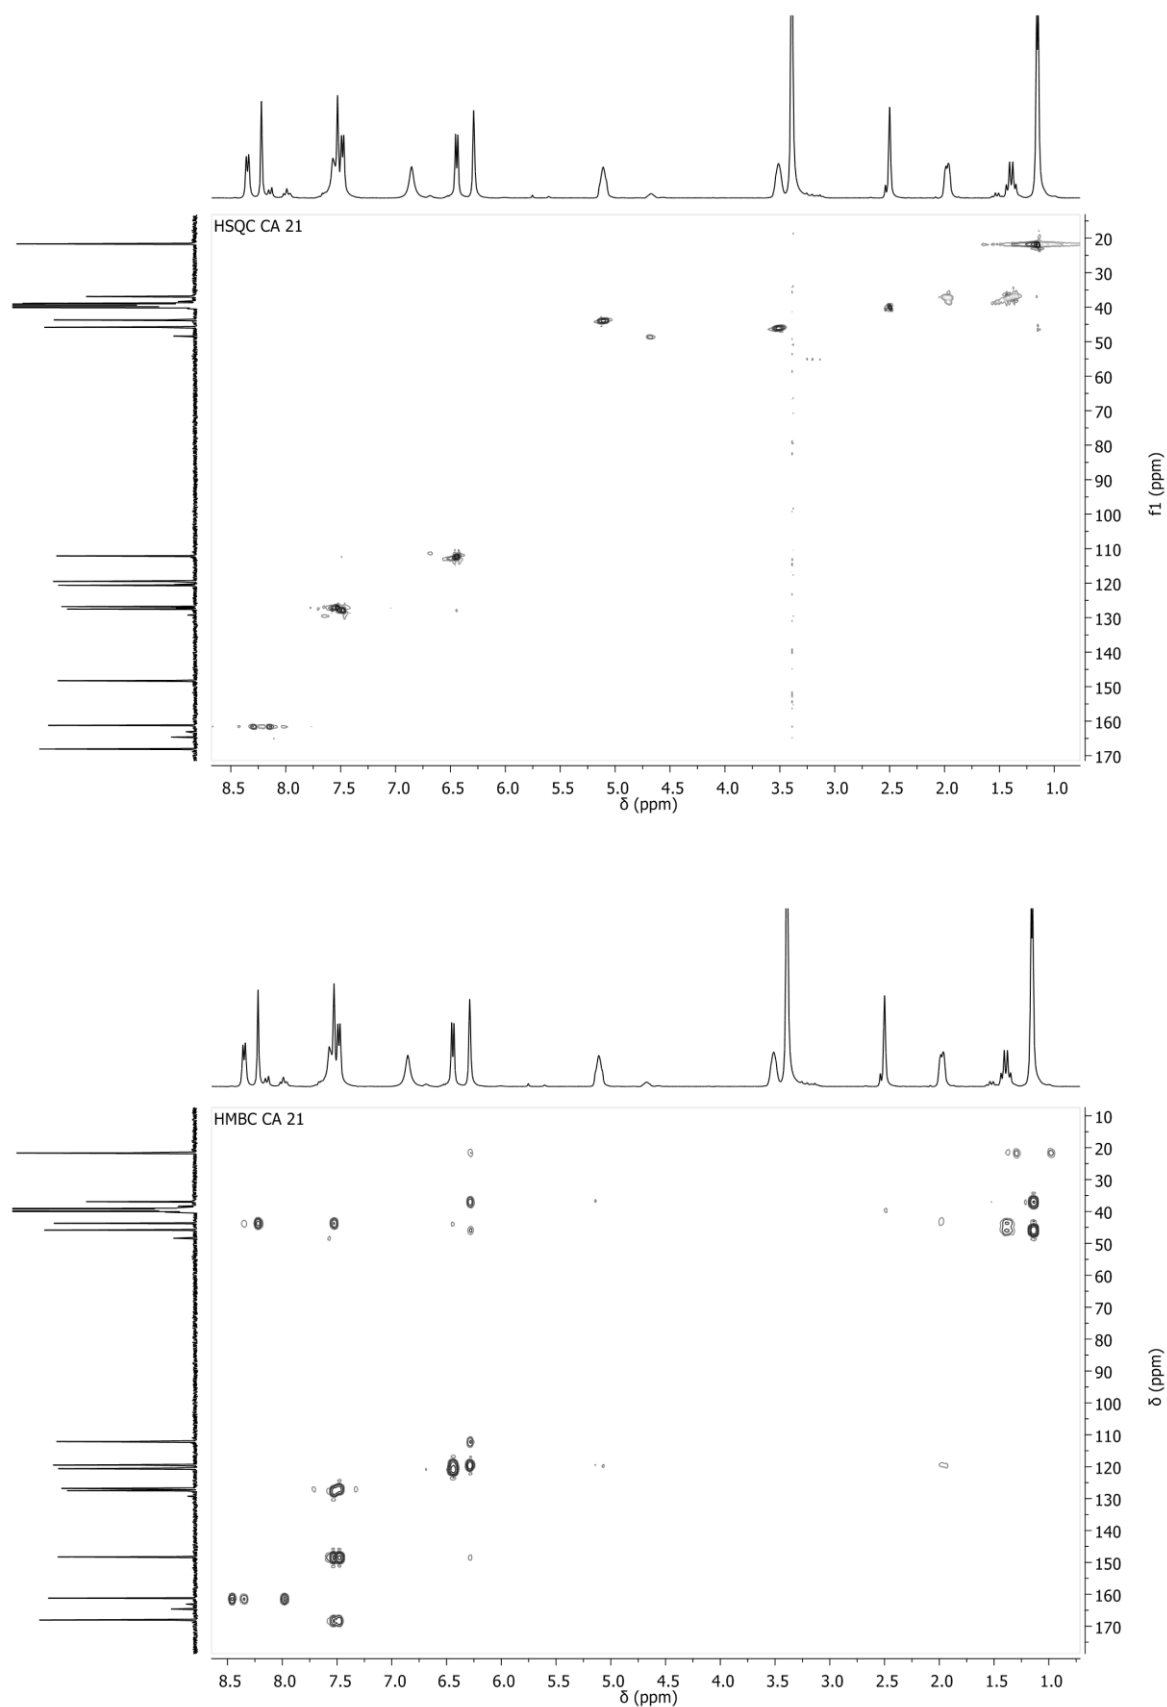

4-Formamido-2-methyl-1,2,3,4-tetrahydroquinoline-6-carboxylic acid, **3j**.

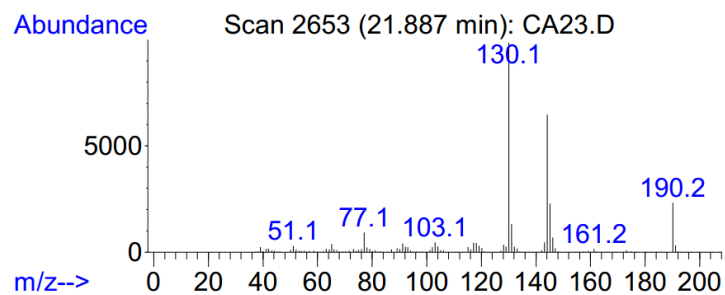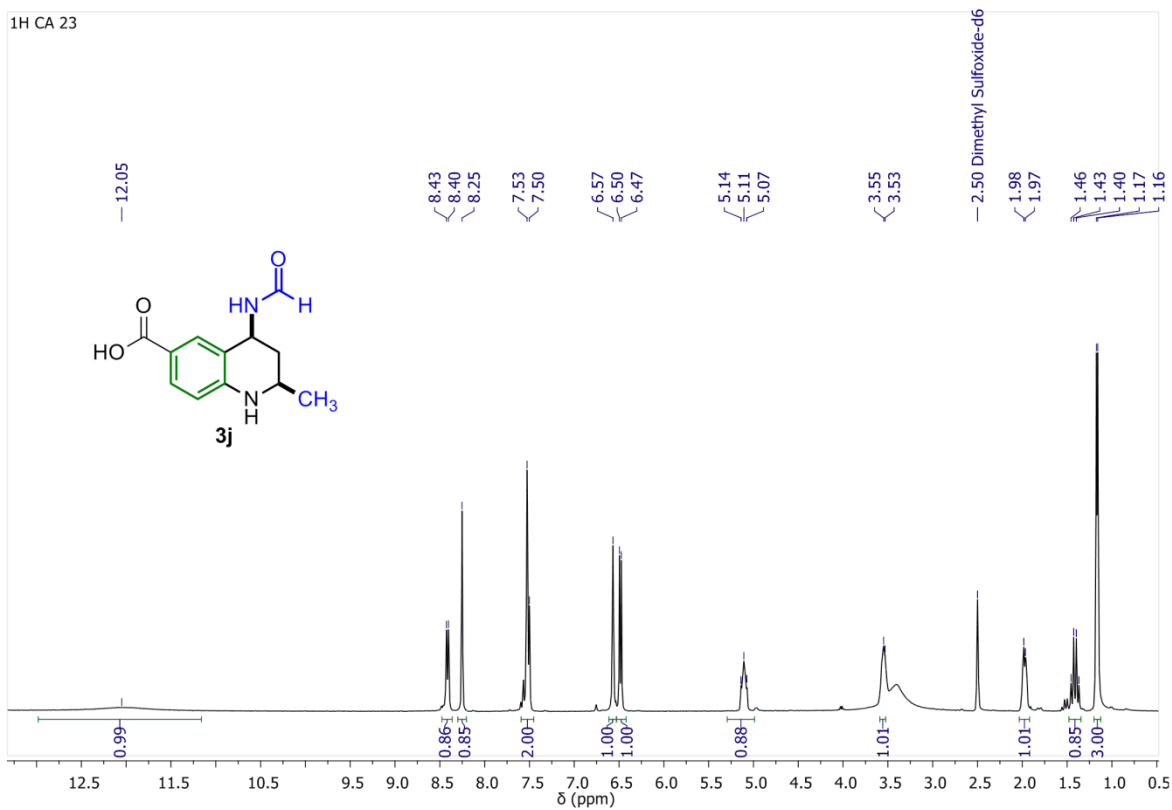

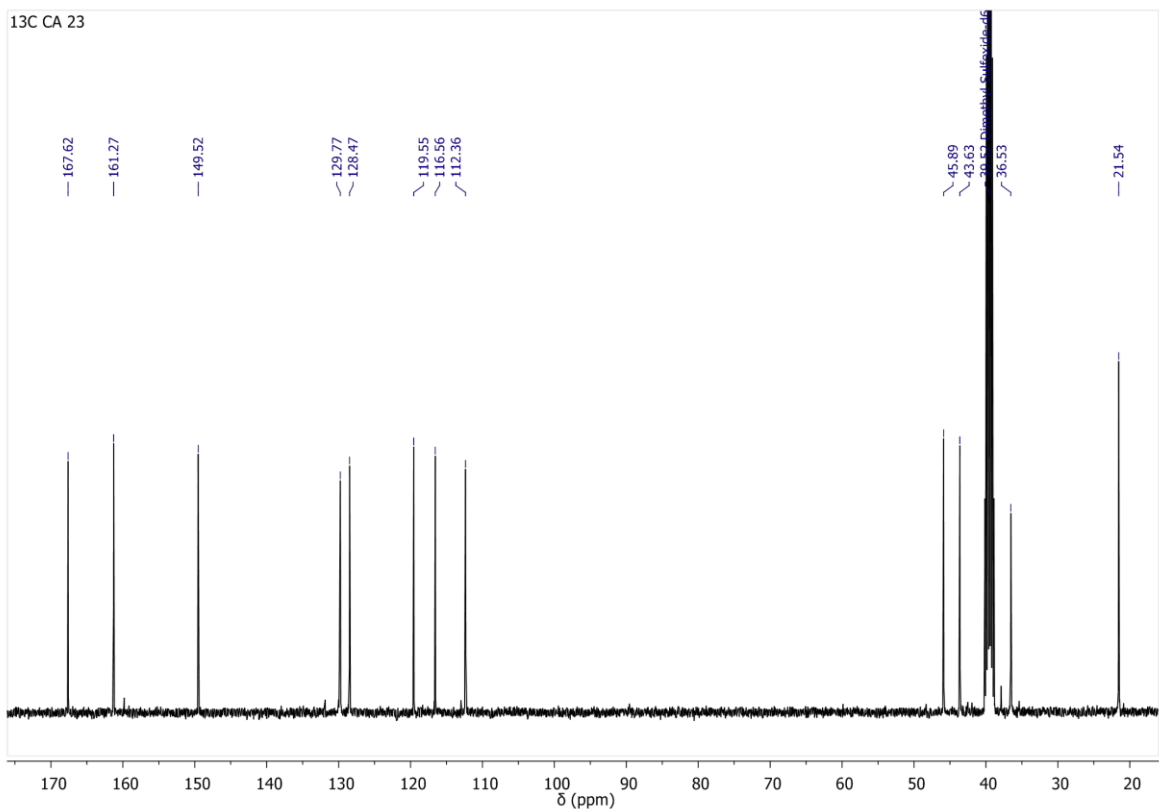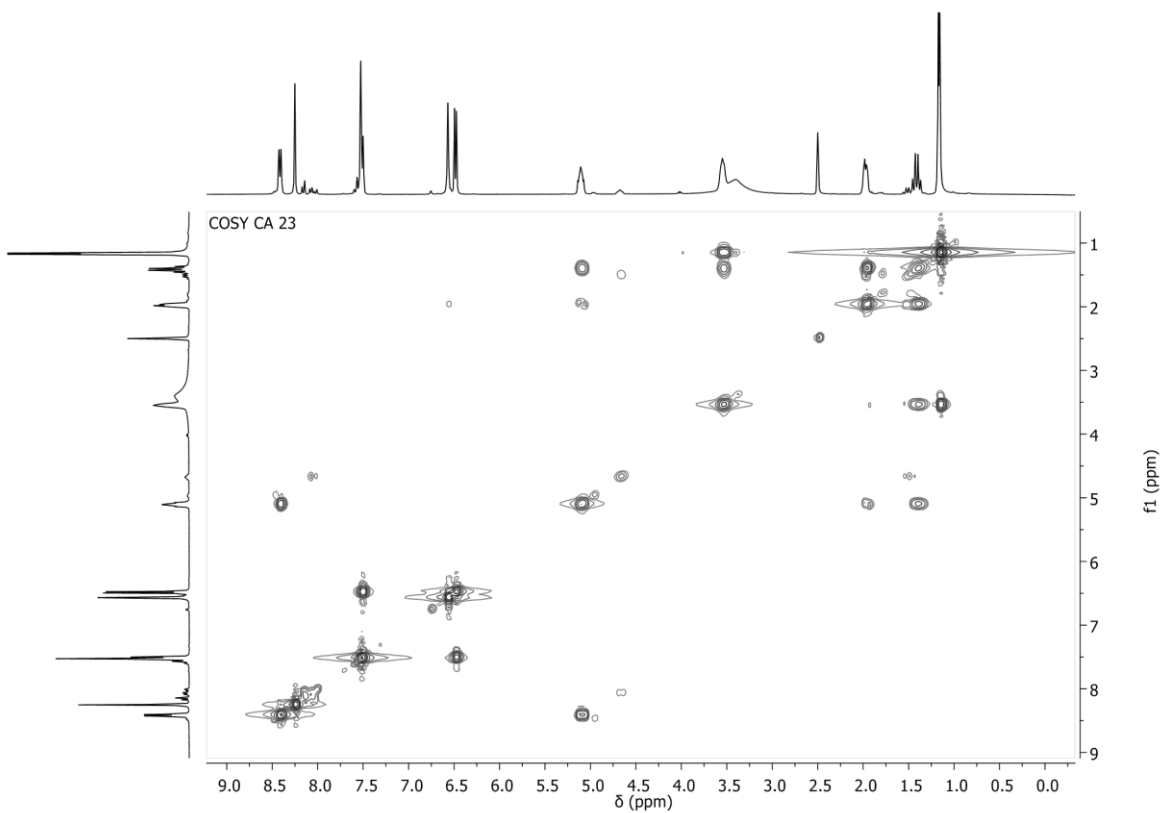

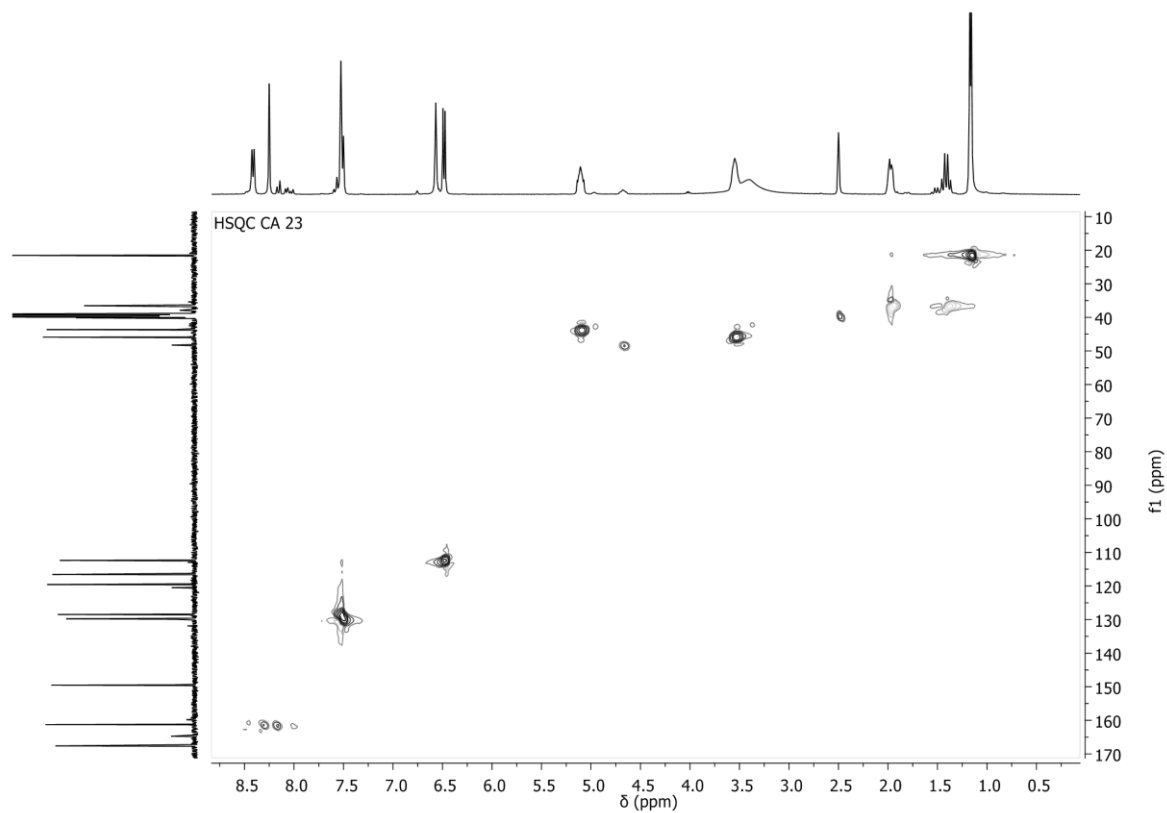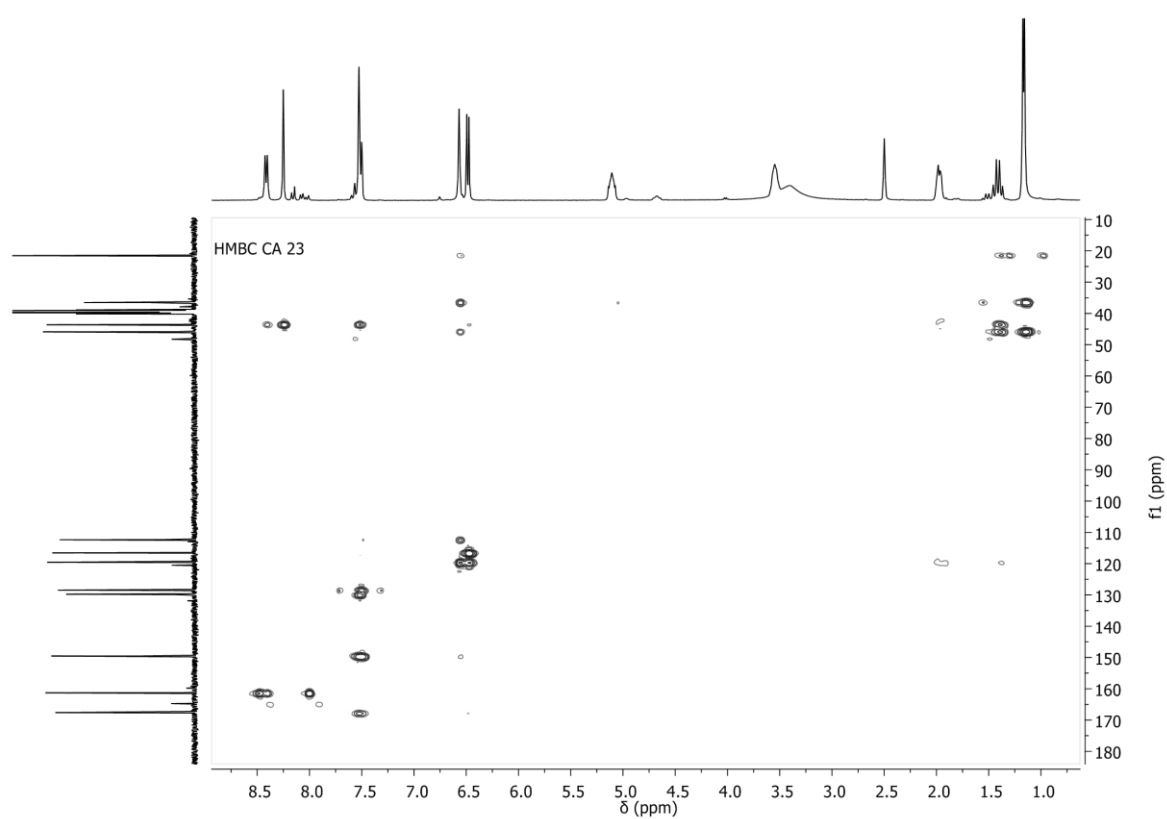

1-(6-Acetyl-2-methyl-1,2,3,4-tetrahydroquinolin-4-yl) pyrrolidin-2-one, **3k**.

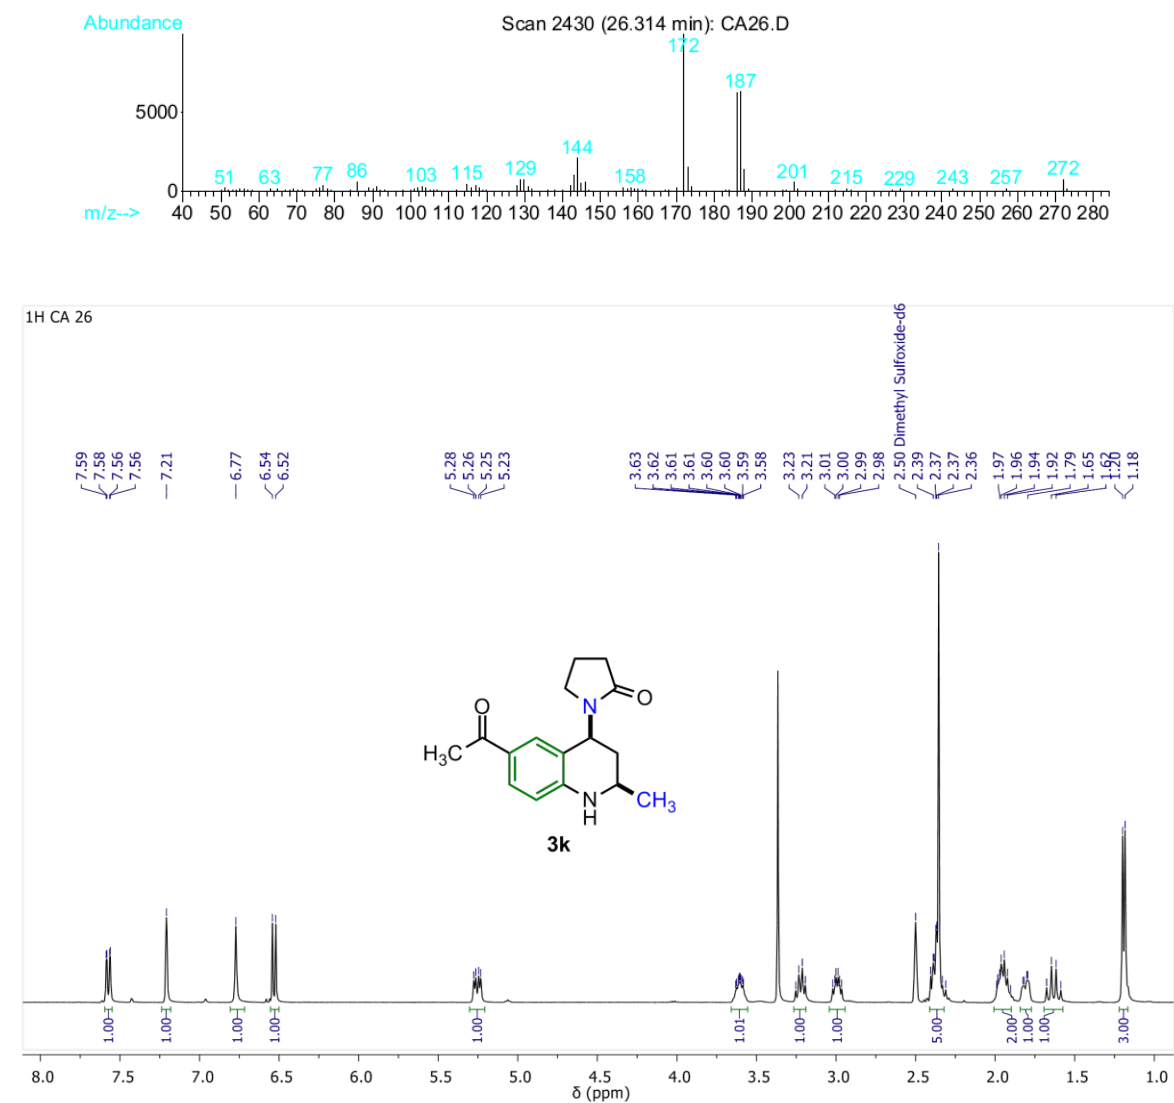

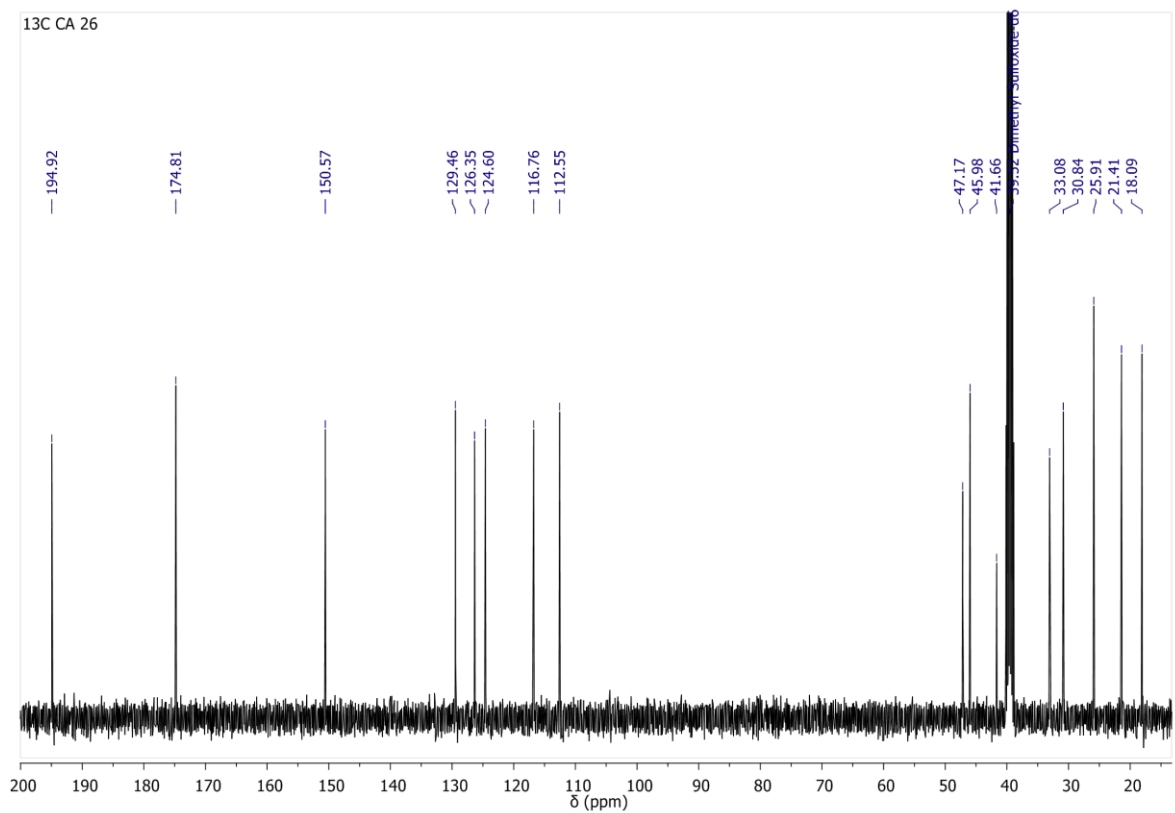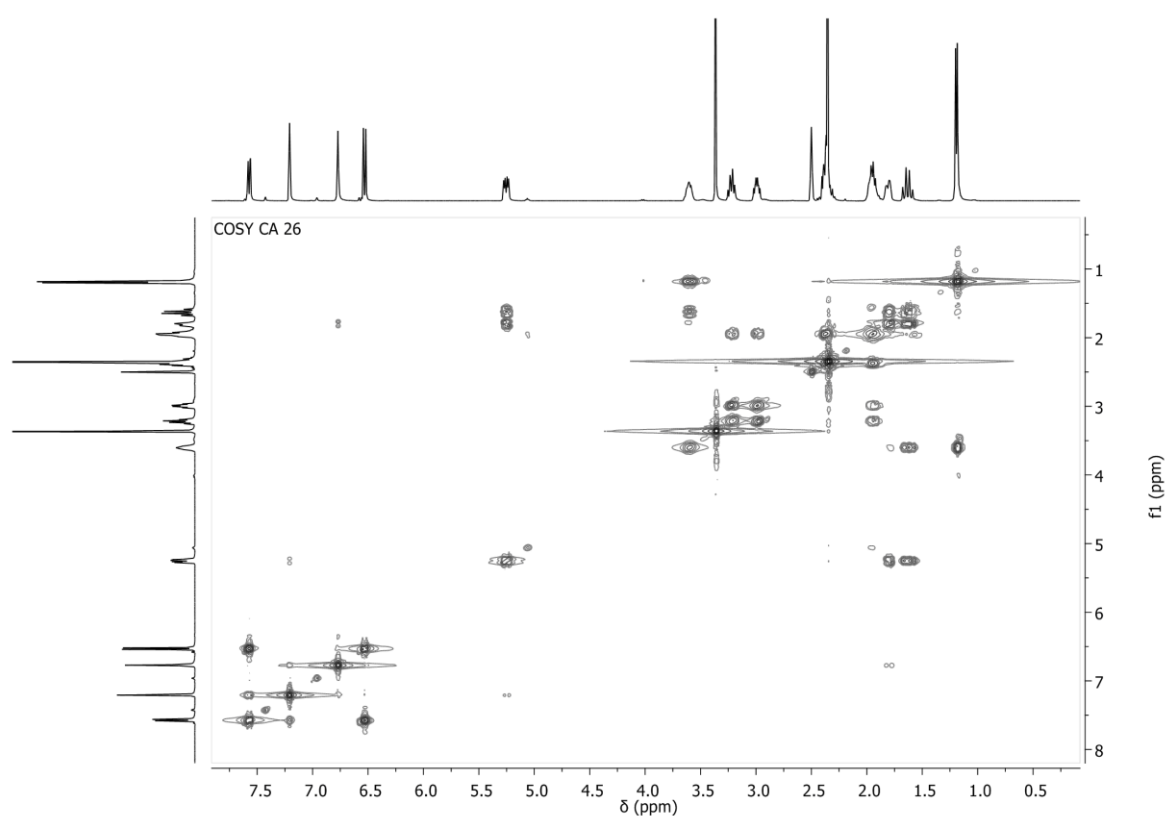

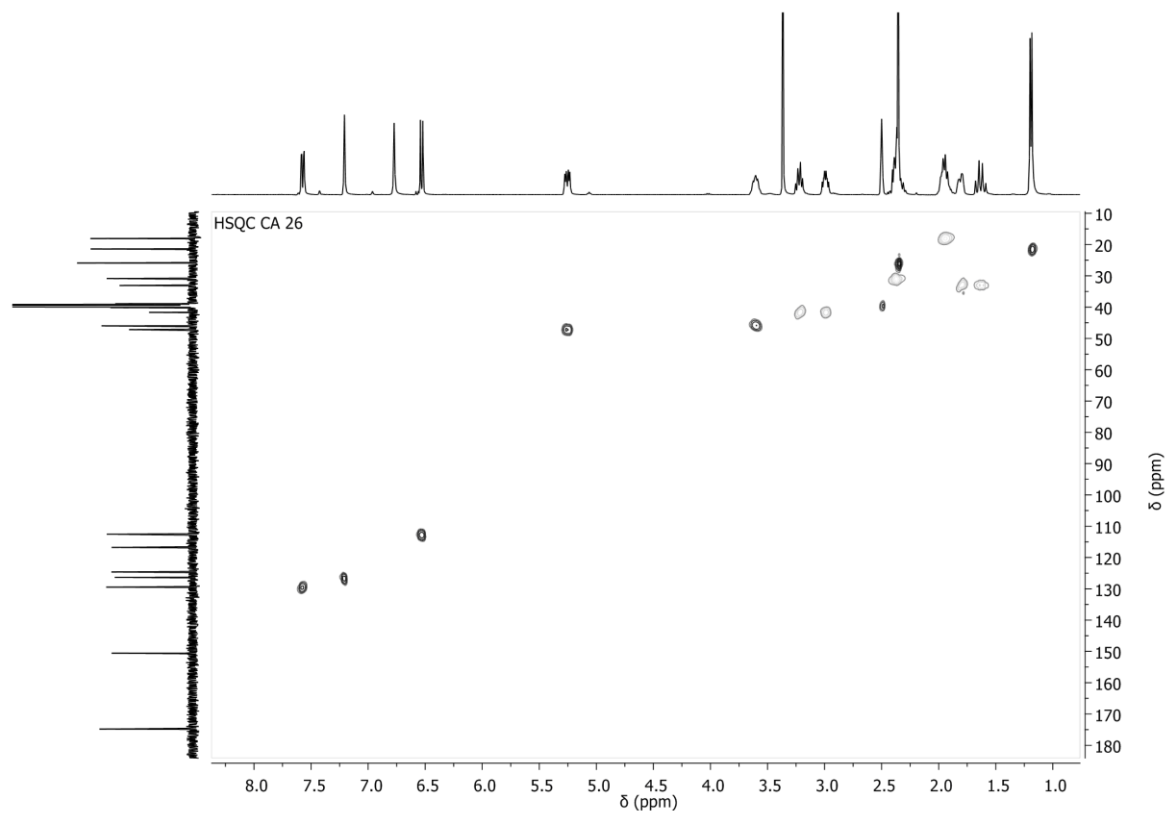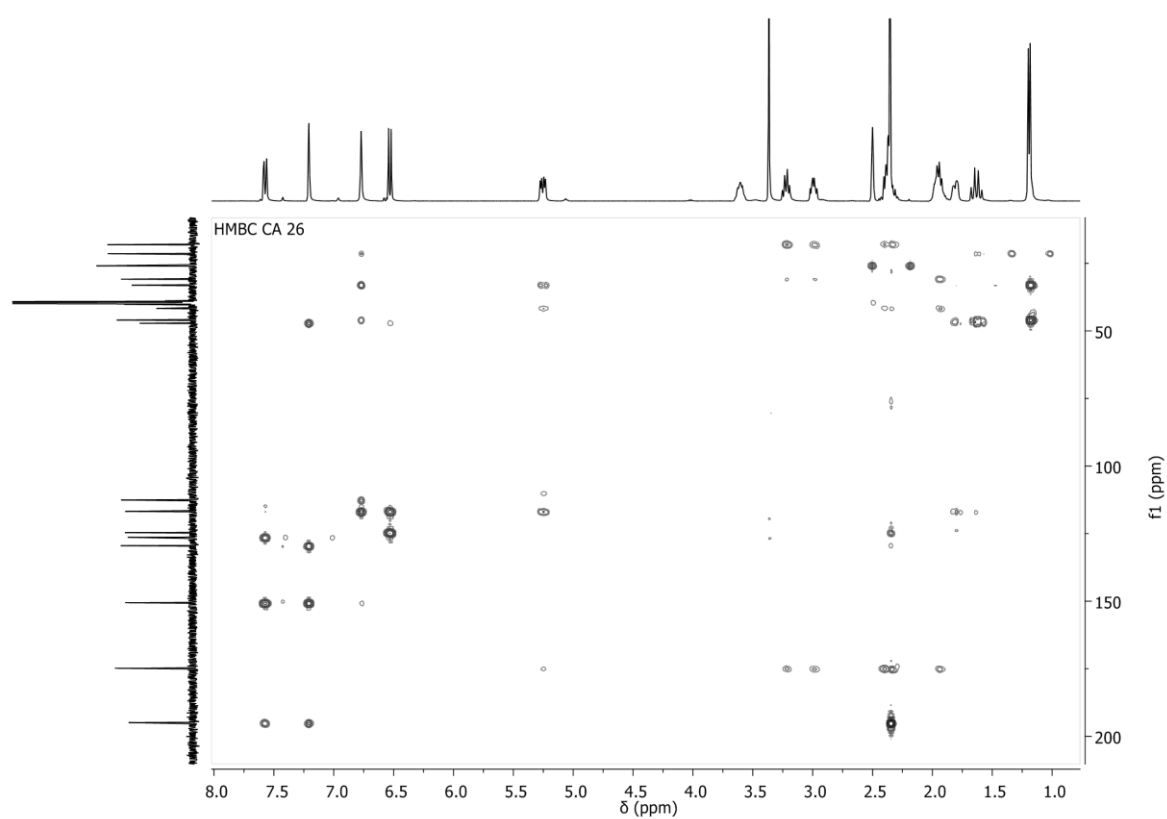

1-(2-Methyl-1,2,3,4-tetrahydroquinolin-4-yl) pyrrolidin-2-one, **3I**.

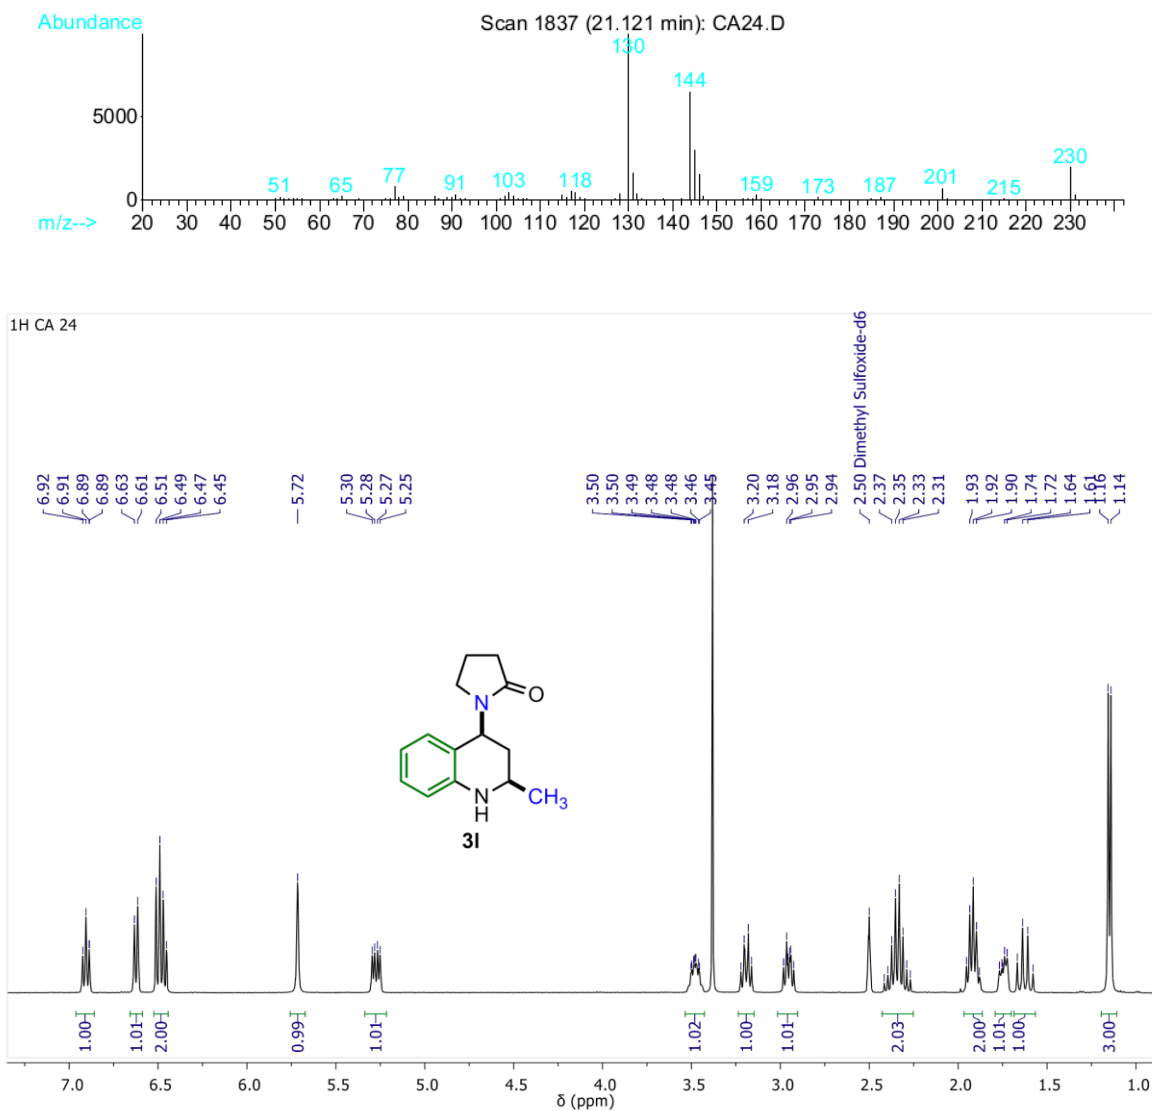



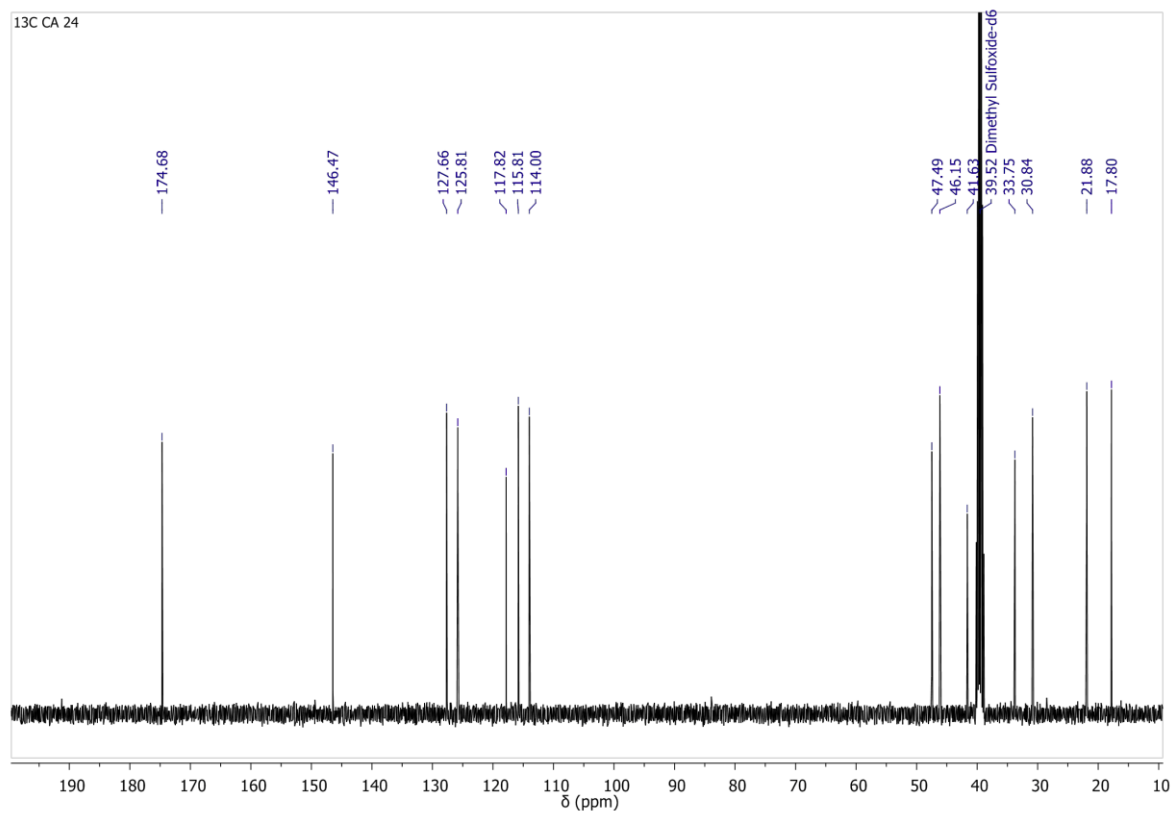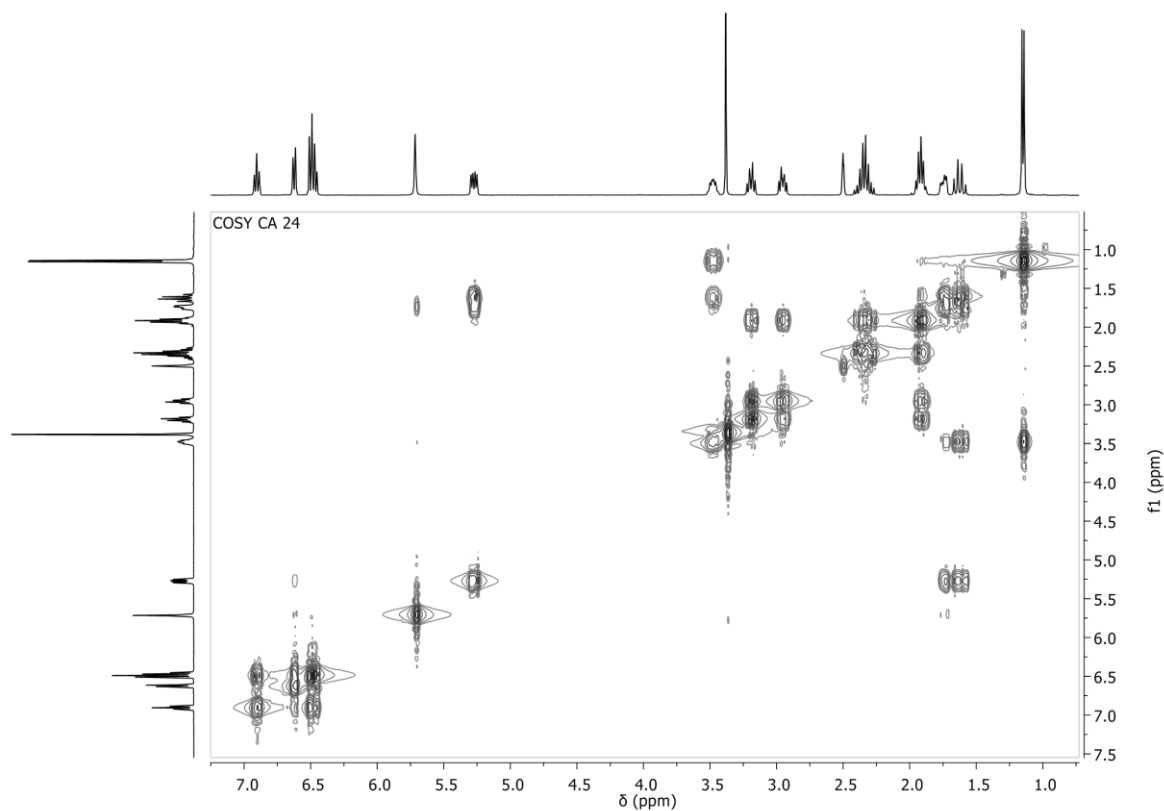

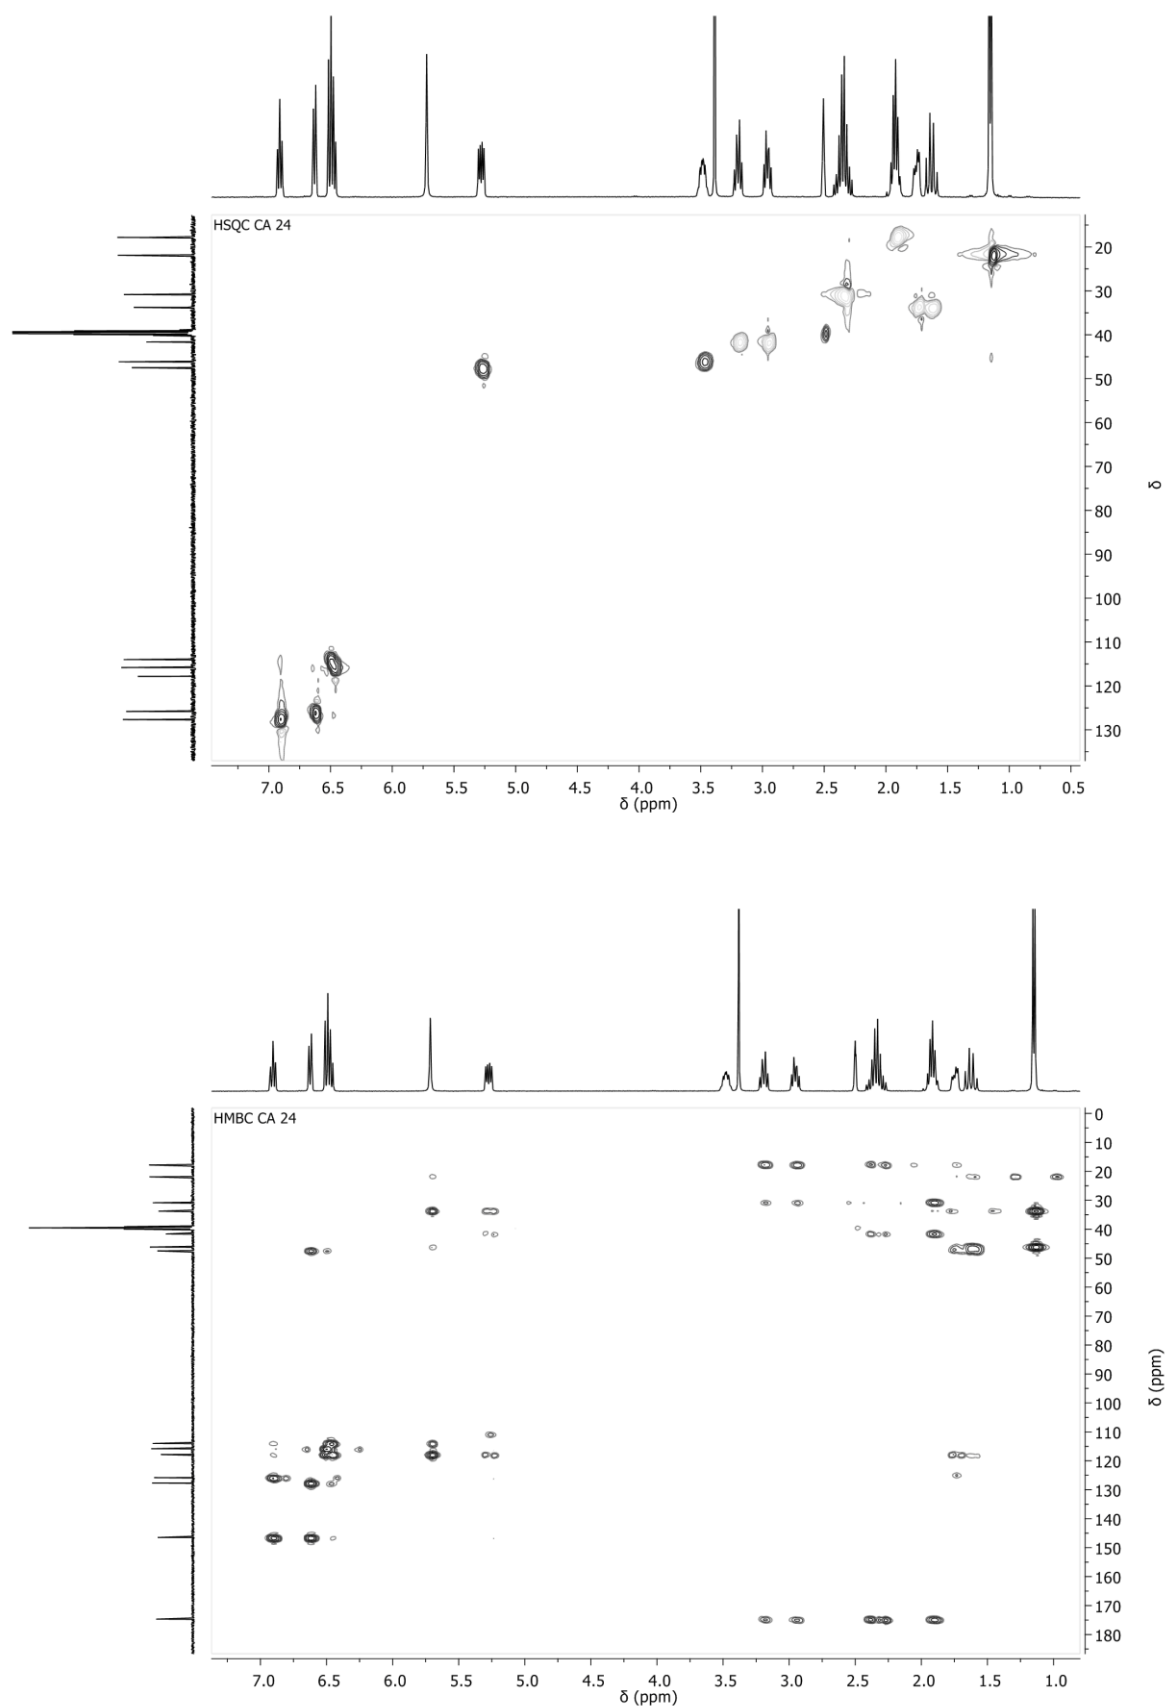

1-(6-Methoxy-2-methyl-1,2,3,4-tetrahydroquinolin-4-yl) pyrrolidin-2-one, **3m**.

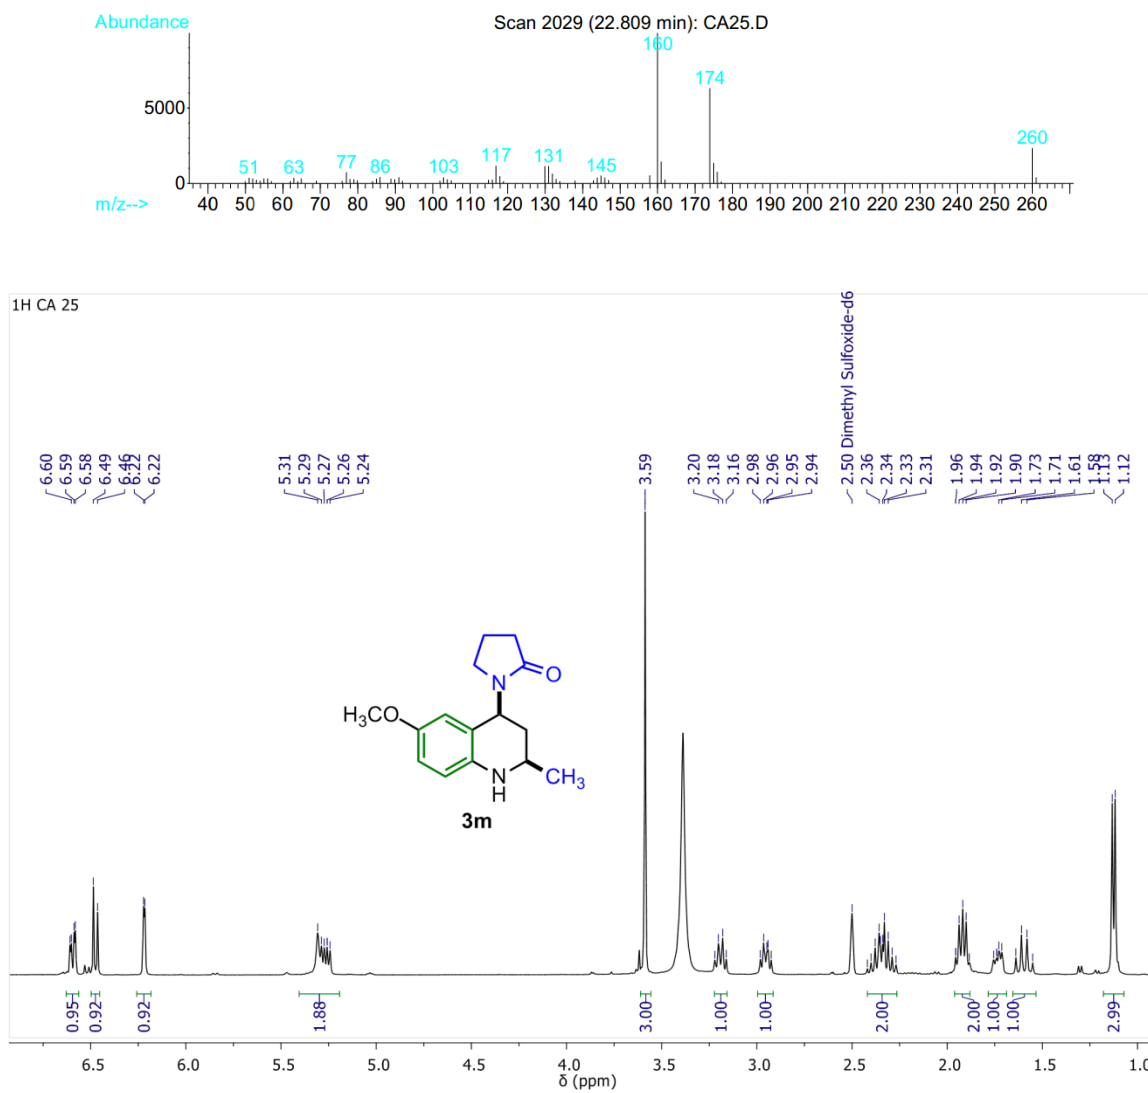

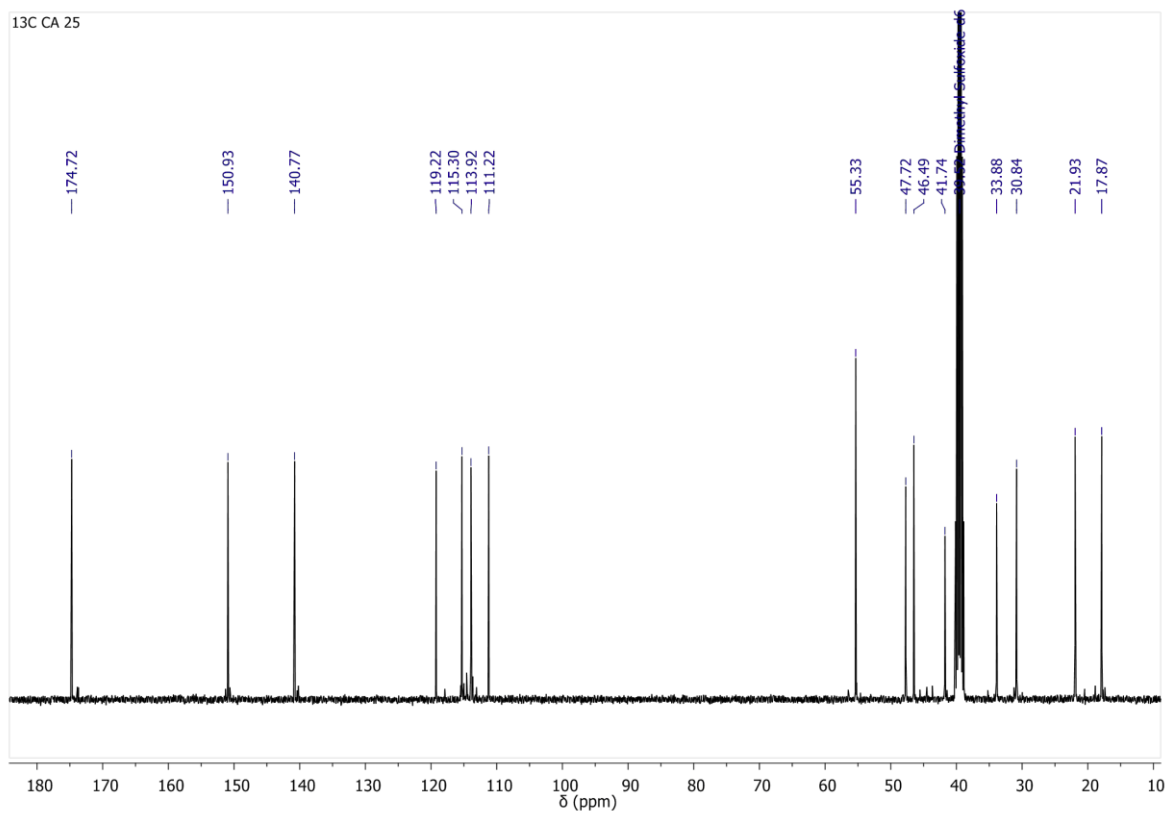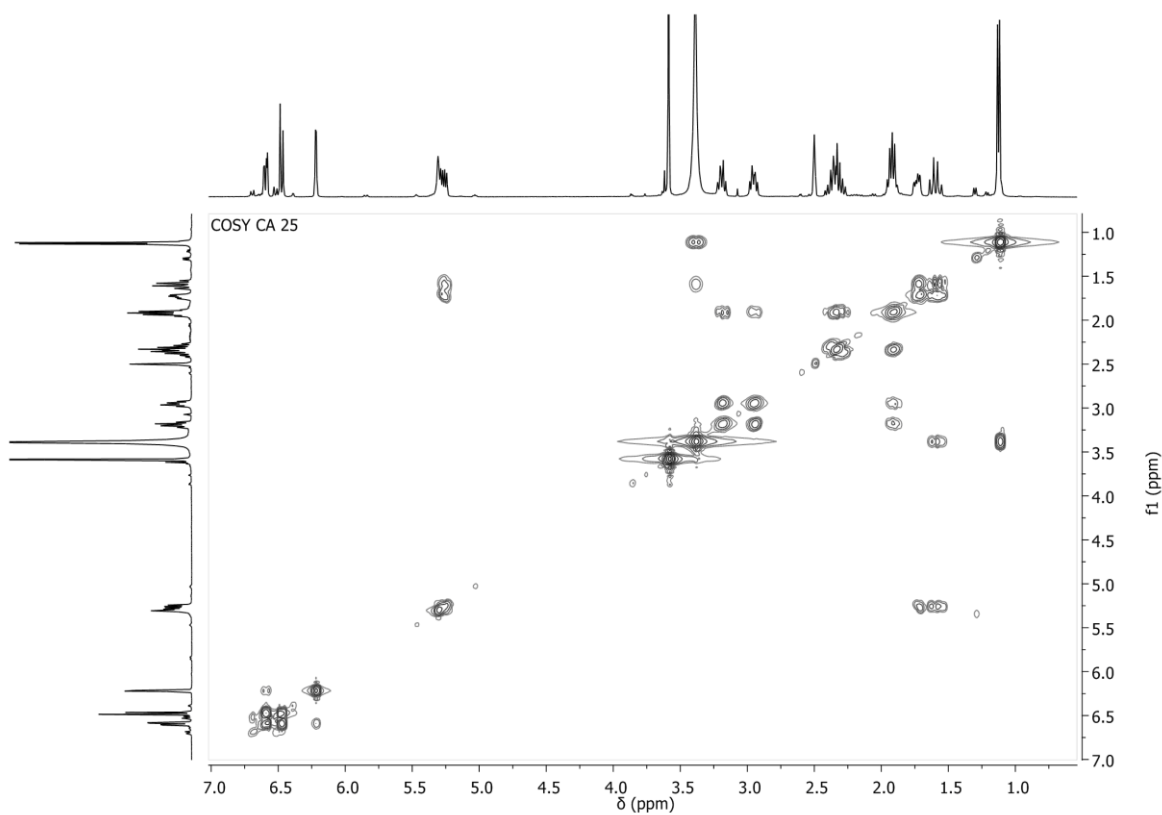

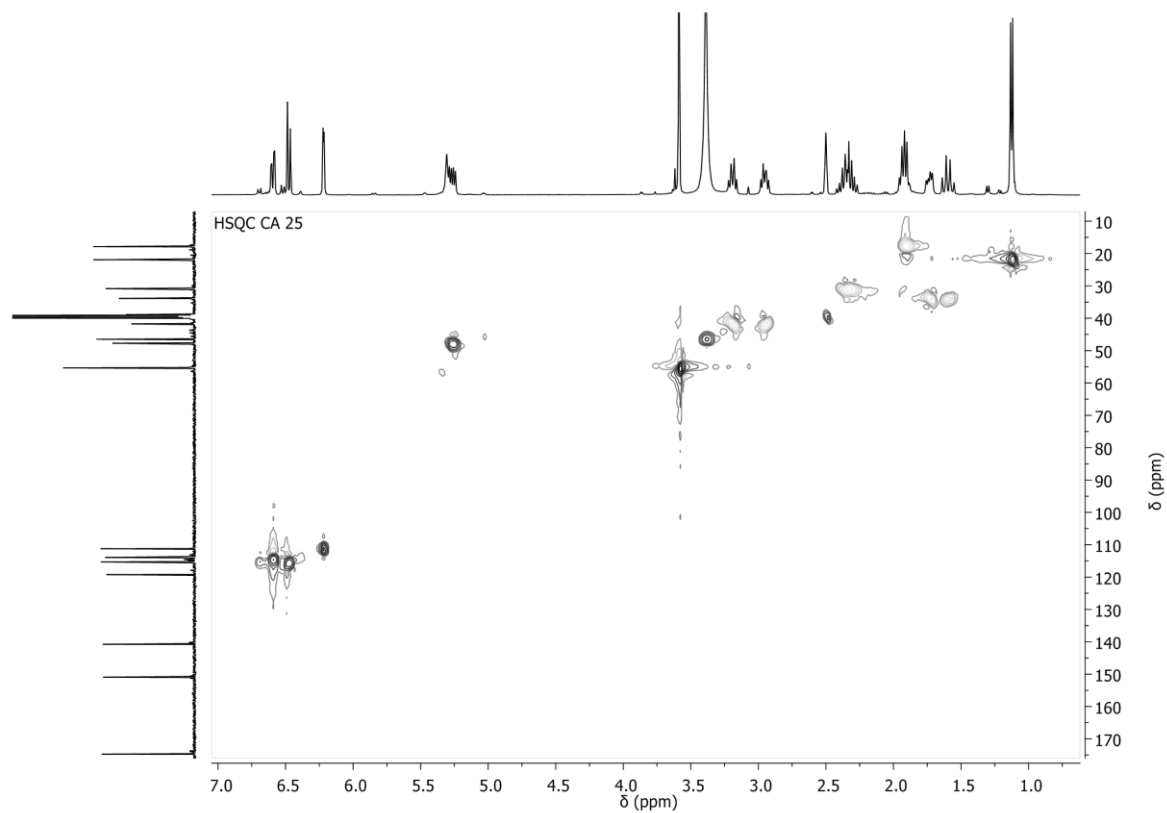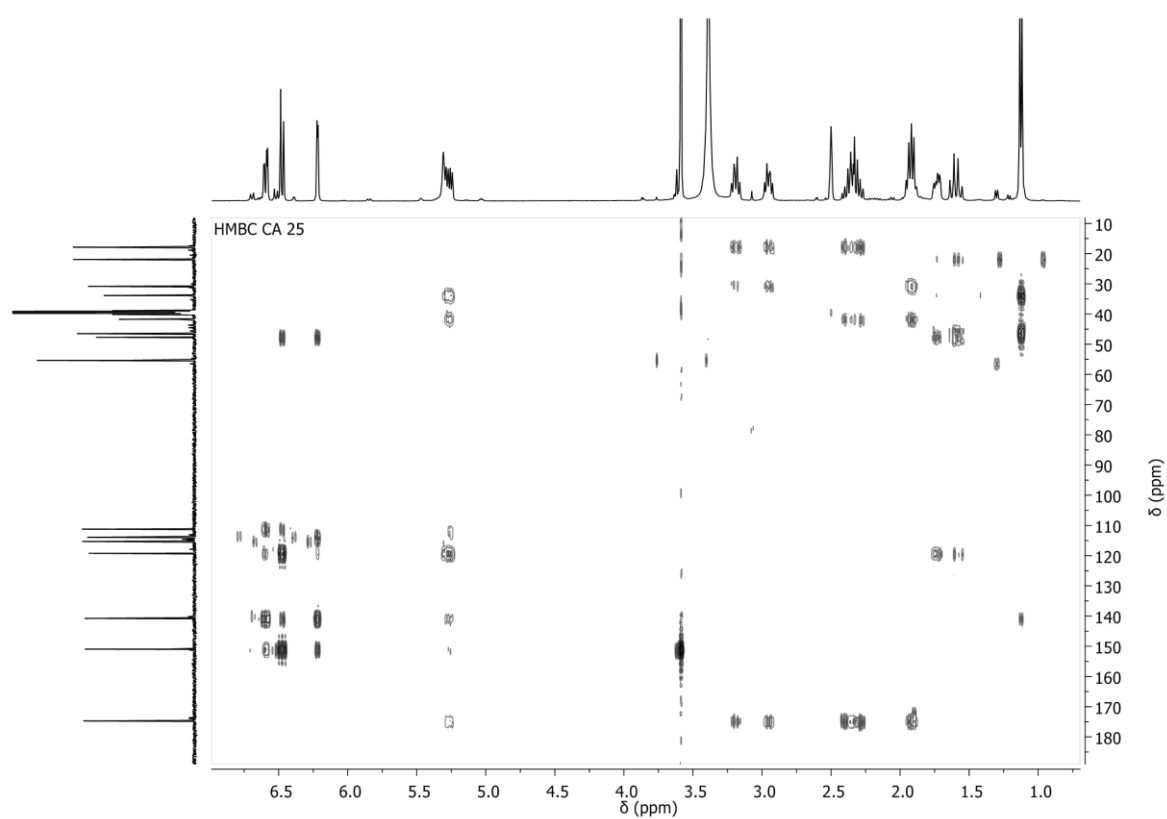

4-Methyl-4-(2-oxopyrrolidin-1-yl)-1,2,3,4-tetrahydroquinoline-6-carboxamide, **3n**.

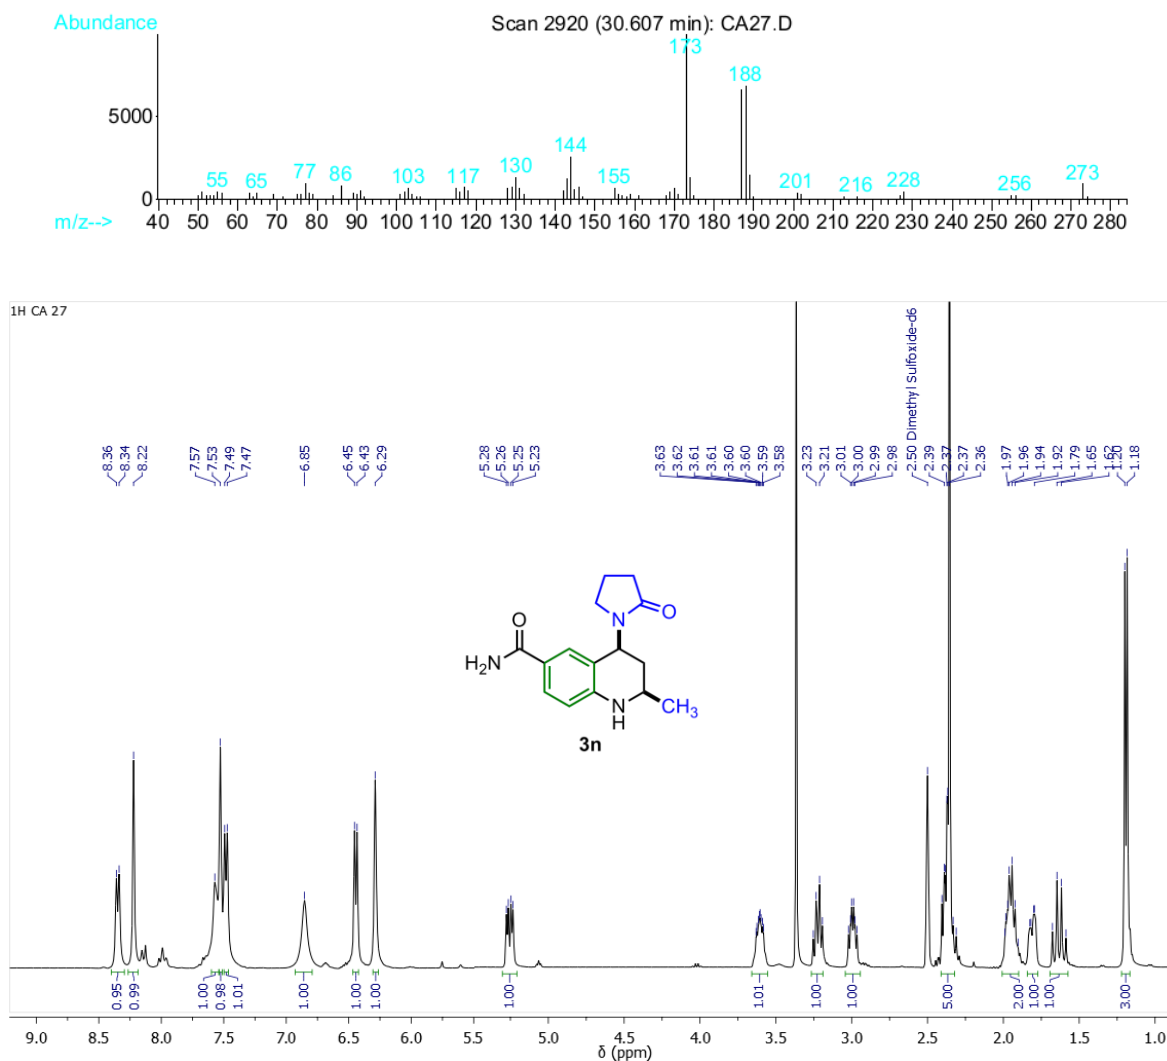

2-Methyl-4-(2-oxopyrrolidin-1-yl)-1,2,3,4-tetrahydroquinoline-6-carboxylic acid, **3o**.

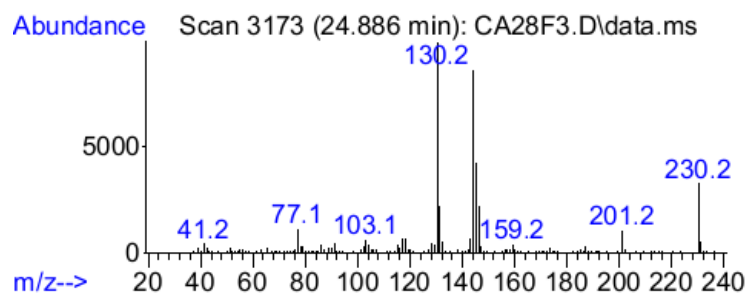

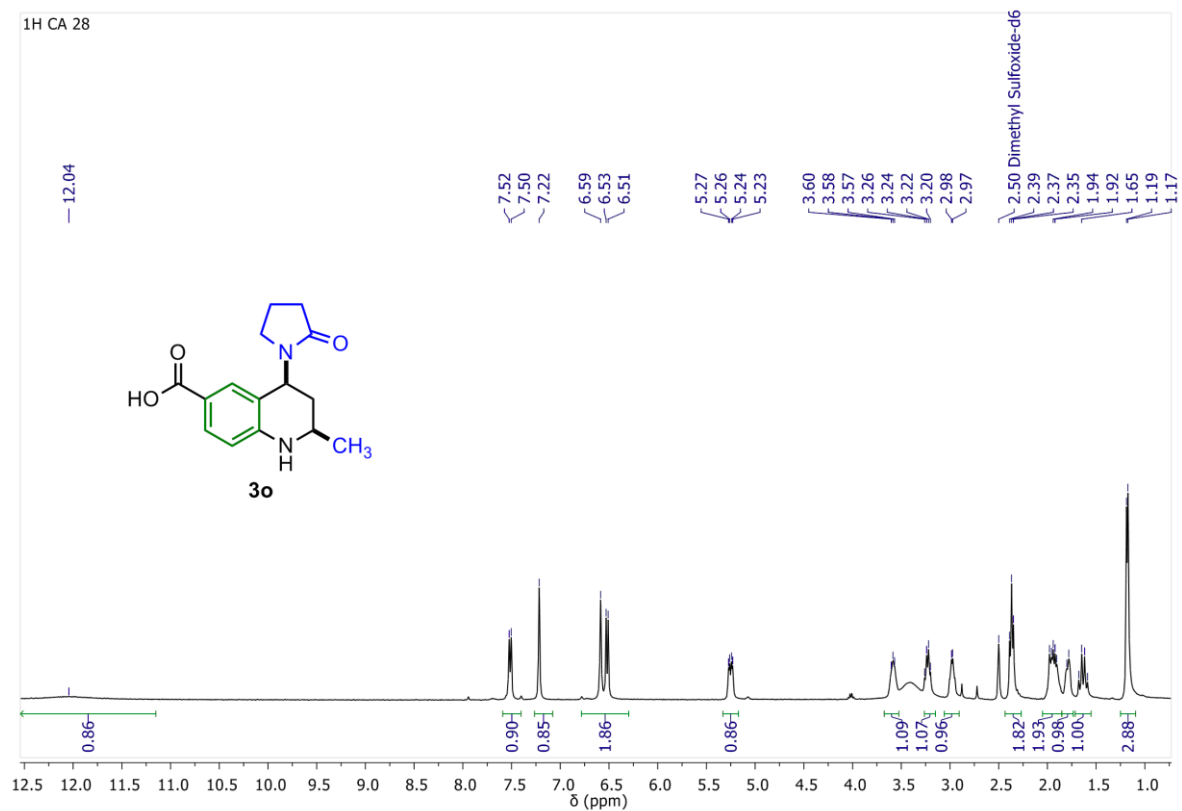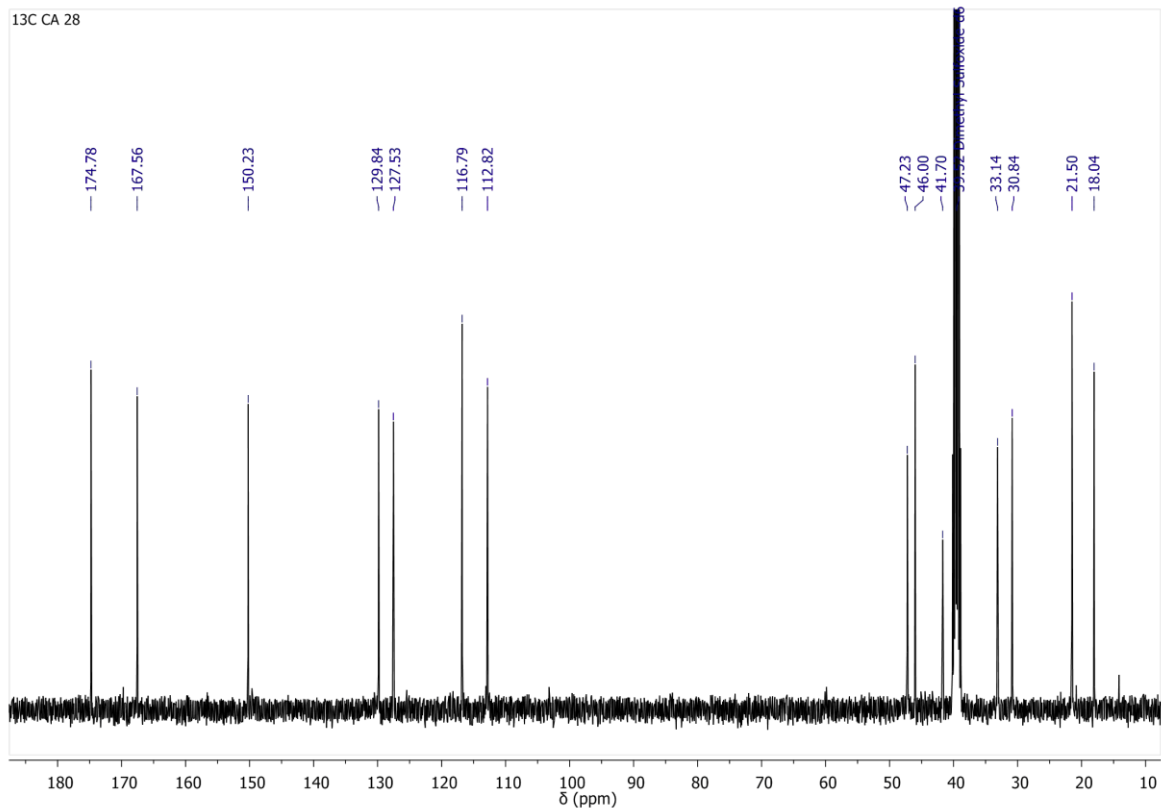

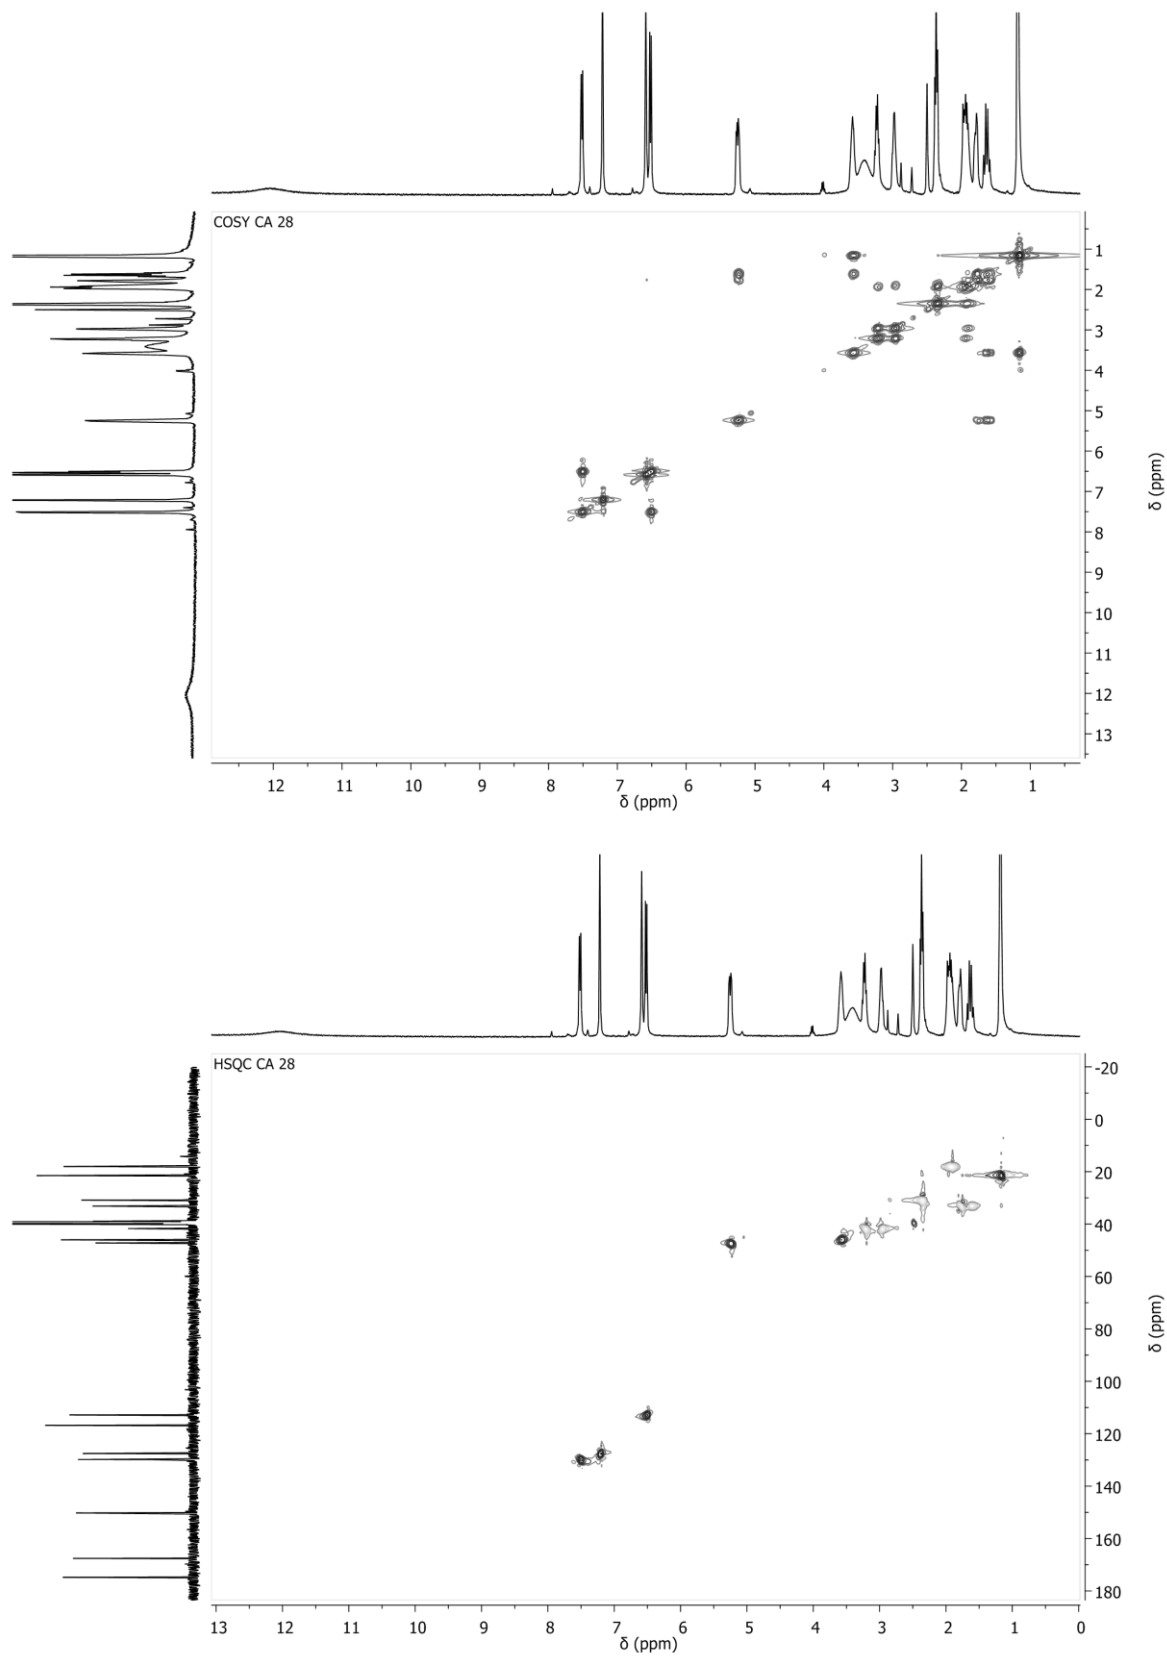



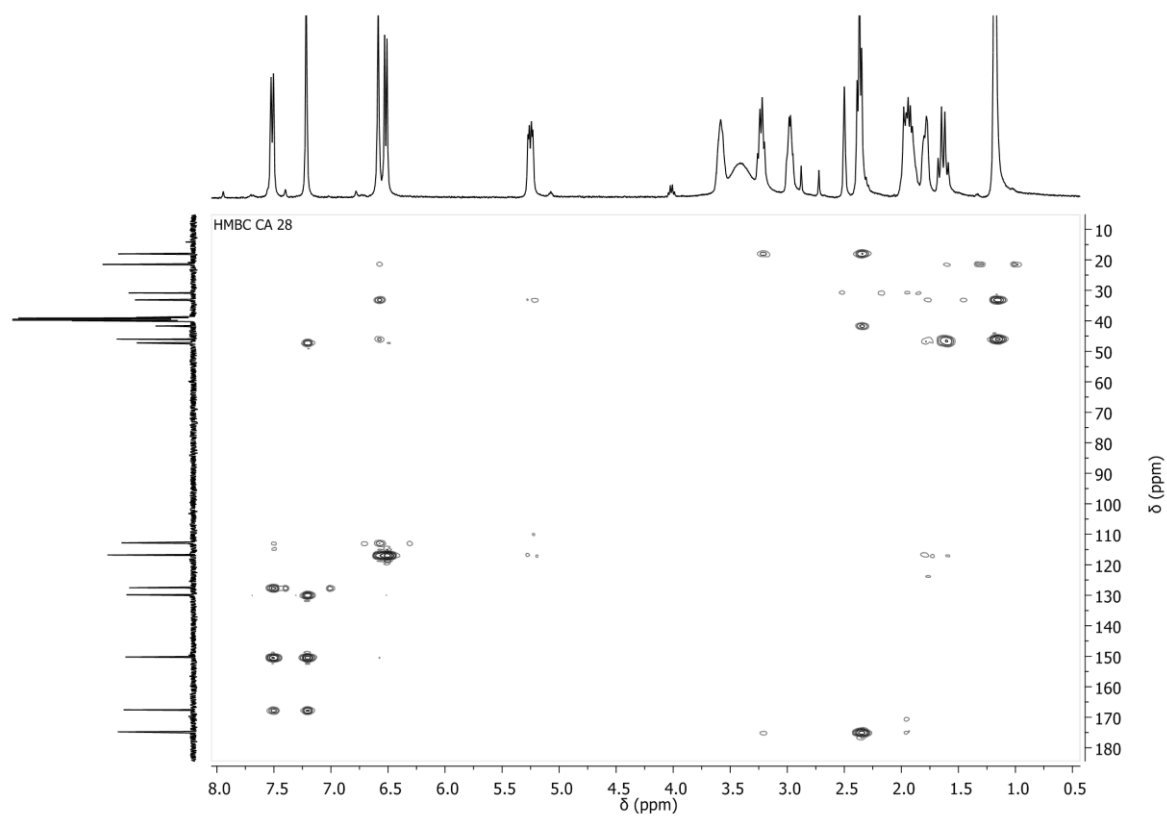

Supplement: c3ob40171e.pdf [file c3ob40171e.pdf]
